# Supplementary material for: Functional connectome differences in individuals with hallucinations across the psychosis continuum
Source: PubMed Central journal article supplement (PMC7806763; doi:10.1038/s41598-020-80657-8), 2021-01-13
Supplement: 41598_2020_80657_MOESM1_ESM.pdf [file 41598_2020_80657_MOESM1_ESM.pdf]

## Supplementary Content

Functional connectome differences in individuals with hallucinations across the psychosis continuum.

Maya J.L. Schutte, Marc M. Bohlken, Guusje Collin, Lucija Abramovic, Marco P.M. Boks, Wiepke Cahn, Meenakshi Dauwan, Edwin van Dellen, Neeltje E.M. van Haren, Kenneth Hugdahl, Sanne Koops, René C.W. Mandl, Iris E.C. Sommer.

### Supplementary Methods

### Supplementary Results

### Supplementary Discussion

**Supplementary Table 1** Reasons of exclusion for scans listed per study

**Supplementary Table 2** Reasons of exclusion for scans listed per clinical status

**Supplementary Table 3** Post-hoc tests of significant differences in age across the groups

**Supplementary Table 4** Post-hoc tests of significant differences in sex across the groups

**Supplementary Table 5** Overlapping edges between NC-H, SCZ-H and BD-H

**Supplementary Figure 1** Distance dependent effects of motion on edge strength

**Supplementary Figure 2** Functional connectome alterations in matched subgroups

**Supplementary Figure 3** Results of network based statistics using the Power-260 atlas

**Supplementary Figure 4** Conjunction analysis on the NBS networks of NC-H, SCZ-H and BD-H

**Supplementary Figure 5** Clusters defined by elbow method for k-means clustering

**Supplementary Figure 6** Functional connectome disturbances in BD-H and BD-AH.

**Supplementary Figure 7** Random forest classification based on the connections of the NBS network.

**Supplementary Table 6** Results of the network based statistics for non-clinical individuals with hallucinations versus healthy controls using the AAL atlas

**Supplementary Table 7** Results of the network based statistics for schizophrenia patients with hallucinations versus healthy controls using the AAL atlas

**Supplementary Table 8** Results of the network based statistics for bipolar-I disorder patients with hallucinations versus healthy controls using the AAL atlas

**Supplementary Table 9** Results of the network based statistics across all three hallucination groups using the AAL atlas

**Supplementary Table 10** Results of the network based statistics for non-clinical individuals with hallucinations versus healthy controls using the Power atlas.

**Supplementary Table 11** Results of the network based statistics for schizophrenia patients with hallucinations versus healthy controls using the Power atlas.

**Supplementary Table 12** Results of the network based statistics for bipolar-I disorder patients with hallucinations versus healthy controls using the Power atlas.

**Supplementary Table 13** List of features for random forest classifier in non-clinical individuals with hallucinations.

**Supplementary Table 14** List of features for random forest classifier in schizophrenia patients with hallucinations.

**Supplementary Table 15** List of features for random forest classifier in bipolar-I disorder patients with hallucinations.

**Supplementary Table 16** List of abbreviations for brain areas AAL-atlas

## Supplementary Methods

### Participants

All subjects participated in one of the following studies: *Bipolar Genetics* study (procedures are described by Vreeker and colleagues [1]), *The Outcome of Psychosis and Fitness Therapy* study [2], *Simvastatin for recent onset psychosis* study ([3]; baseline data), *Spectrum* study [4] and the *Understanding Hallucinations* study (inclusion ongoing). This is the first study to combine the resting state functional magnetic resonance imaging (MRI) data across diagnostic categories to investigate a shared neural correlate of hallucinations.

A diagnosis of bipolar-I disorder and a schizophrenia spectrum disorder was defined according to the Diagnostic and Statistical Manual for Mental Disorders (DSM-IV-TR; [5]). Absence or presence of psychopathology was assessed using the Structured Clinical Interview for DSM-IV (SCID-I; [6]), the Mini-International Neuropsychiatric Interview (MINI; [7]), or the Comprehensive Assessment of Symptoms and History Interview (CASH; [8]). The non-clinical individuals did not fulfil criteria of a DSM-IV diagnosis, but did score higher on the Schizotypal Personality Questionnaire (SPQ; [9]) compared to healthy controls [10]. A history of hallucinations and/or delusions was assessed using section B of the SCID-I or CASH interview. All participants were at least 18 years of age. Handedness, sex, and current use of antipsychotic medication and/or lithium were recorded. All participants provided written informed consent. The studies were approved by the Institutional Review Board of the University Medical Center Utrecht and conducted in accordance with the Declaration of Helsinki.

The *Bipolar Genetics* study ([1]; BiG) investigates genetic and phenotypic characteristics of patients with bipolar disorder type I (BD-I) first degree relatives and controls, and is part of a collaboration between the University of California Los Angeles (UCLA), University Medical Center Utrecht (UMCU) GGZ Altrecht, and GGZ InGeest, University Medical Center Groningen, Delta Center for Mental Health Care, Dimence, Psychiatric Institute The Hague (PsyQ) and Reinier van Arkel Group. For the current study, we included 185 patients with a bipolar-I disorder, and 135 healthy controls recruited via the BiG study.

*The Outcome of Psychosis and Fitness Therapy* study ([2]; TOPFIT) is a multicenter study investigating physical health and the effects of physical therapy in patients with schizophrenia spectrum disorder and healthy controls. Patients were recruited at several Dutch mental health care institutes, including the University Medical Center Utrecht, GGZ Altrecht, GGZ Duin- en Bollenstreek, and GGZ Friesland. For the current study, we included 36 patients with a schizophrenia spectrum disorder, and 42 healthy controls recruited for the TOPFIT study.

The *Simvastatin for recent onset psychosis* study [3] is an ongoing double-blind placebo controlled medication trial that investigates add-on treatment of simvastatin in patients with a recent onset psychosis. Patients were recruited from several Dutch mental healthcare institutes, including the University Medical Center Utrecht, University Medical Center Groningen, GGZ Altrecht, GGZ InGeest, Academic Medical Center Amsterdam, GGZ Arkin. The inclusion criteria were a) between 18-50 years; b) a diagnosis of psychosis not otherwise specified (NOS), schizophrenia, schizophreniform disorder, schizotypal personality disorder; c) the first psychotic episode was not longer than 3 years ago. For the current study, we included 11 patients with a schizophrenia spectrum disorder recruited via the Simvastatin study.

The *Spectrum* study [4] investigated the effect of hallucinations in schizophrenia patients and participants with non-clinical hallucinations. Participants were recruited via a website [www.verkenuwgeest.nl](http://www.verkenuwgeest.nl) ("explore your mind"). Inclusion criteria for non-clinical voice hearers were: a) voices were distinct from thoughts and had a "hearing" quality; b) voices were experienced at least once a month; c) absence of psychiatric disorders other than anxiety or depressive disorder in full remission as assessed in a psychiatric examination using the CASH, and the SCID-II interviews; d) absence of alcohol or drug abuse for at least 3 months prior to the assessment; e) absence of chronic somatic disorder. In the current study, we included 51 healthy controls, 40 non-clinical individuals with hallucinations, and 37 patients with a schizophrenia spectrum disorder.

The *Understanding Hallucinations* (UH) study is an ongoing multicenter cross-sectional study that investigates phenomenology and underlying brain mechanisms of hallucinations across a wide range of disorders (clinicaltrials.gov identifier NCT02460965). Participants were recruited via several institutes in the Netherlands, including the University Medical Center Utrecht, Parnassia Psychiatric Institute, VU medical center Amsterdam, Diaconessenhuis Utrecht, and University Medical Center Groningen. Inclusion criteria were; 1) age  $\geq$  18 years; and 2) experienced hallucinations in the past month; or never experiences hallucinations in life. For the current study, we included 15 patients with a schizophrenia spectrum disorder who were recruited for the Understanding Hallucinations study.

### Data acquisition

All participants were acquired on the same 3 tesla Achieva Philips clinical MRI scanner equipped with an 8-channel SENSE head coil at the University Medical Center Utrecht (Philips, Best, The Netherlands). Anatomical 3D high-resolution T1-weighted images were obtained for anatomical reference with the following parameter settings: echo time [TE] = 4.6 ms, repetition time [TR] = 10 ms, flip angle = 90°, Field of View (FOV) = 240 mm/100%, voxel size 0.75 × 0.75 × 0.80 mm, reconstruction matrix = 200 × 320 × 320. For 49 participants included in the Spectrum study [4], T1-weighted images with a lower resolution were available: 160 contiguous sagittal slices (TE = 4.6 ms, TR = 10 ms, flip angle = 8°, FOV = 224 mm, 1 × 1 × 1 mm voxels). Task-free resting state functional data were acquired using a 3D PRESTO sequence that allowed for fast functional brain coverage every 609 ms [11]. All participants were instructed to keep their eyes closed. Parameters settings were: (40 (coronal) slices, TE = 32.4 ms, TR = 21.75 ms, flip angle = 10°, FOV = 224 × 256 × 160, 4 × 4 × 4 mm voxels). Using this sequence, between 600-1000 images were obtained depending on the study for which the data was acquired, after which all resting state scans were resized to the first 600 images (~6 minutes). All scans were checked for radiological abnormalities.

### Data preprocessing

Preprocessing was done using the FMRIB Software Library (FSL) version 5.0.4 [12] with FEAT's default settings, including skull stripping (BET), motion correction with MCFLIRT, spatial smoothing (5mm kernel at full width at half maximum) and high-pass filtering (100-second cut-off). The mean global signal was not included, as this could potentially bias group differences or increase the risk of removing a valuable signal [13-15]. In-scanner motion can influence functional connectivity measures and is known to disproportionately affect the functional connectome of patients versus controls [16-17]. Several steps were taken to prevent a systematic motion-related bias in this study following recent developments in the literature. If the relative root mean square displacement over all frames exceeded 0.2mm; or if 20 individual frames exceeded the threshold of 0.25mm, these subjects were excluded from further analysis [18]. ICA-AROMA was subsequently applied for denoising [19-20]. More information on exclusion of scans due to missing clinical data, poor imaging, data quality, processing errors, motion artefacts, or brain abnormalities reported by the radiologist can be found in the Supplementary material.

### Functional network reconstruction

The average time series for each participant were extracted from N=90 functional regions (nodes) of the automated anatomical labeling (AAL) atlas [21] and N=260 nodes of the Power atlas [22] covering the whole brain, including cortical and subcortical regions. We applied wavelet decomposition on the raw time series to extract a signal in the frequency domain of 0.05 - 0.1 Hz (Scale 4), as resting state studies commonly apply bandpass filtering over the frequency domain between 0.01 - 0.1 Hz [23-25]. Wavelet-based methods have several advantages in terms of denoising [26], robustness to outliers [27], autocorrelations and has the advantage of bypassing the role of positive and negative edge weights compared the traditional band-pass filtering and Pearson correlation coefficients [28]. Because a coherence value is always between 0 and 1, this facilitates possible problems of how to deal with negative edge weights. The coherence was calculated as the mean squared coherence between time series over the chosen wavelet scale in Matlab, using the *mscohere* function.

### Global connectome disturbances

We analyzed disturbances in global network organization related to hallucinations. Two key properties were investigated to characterize network topology. The first property is the weighted global efficiency, which provides information on overall communication efficiency throughout the network [29] and is hence a measure of network integration. It was calculated as the average inverse shortest path length between all node pairs [29]. The second property is the weighted clustering coefficient, which reflects the degree to which nodes in the network tend to cluster together, and is a metric of network segregation. It was calculated as the weighted level of functional connectivity that exists between each nodes' neighbours, proportional to the maximum degree of connectivity [29]. The graph metrics were computed using the Brain Connectivity Toolbox [29]. Thresholding connectivity matrices can bias graph metrics due to differences in edge density and functional connectivity strength between patient and control groups [30-31]. We therefore used unthresholded connectivity matrices and tested if the connectivity strength differed across groups.

Minimum Spanning Tree (MST) analysis provides information on a network's topology and is therefore insensitive to connection strength [32-33]. The Minimum Spanning Tree (MST) is a subnetwork of the original weighted connectivity matrix, connecting all nodes in the network without forming loops, and therefore represents the strongest connections in the network (e.g. a maximum spanning tree) [32]. For each subject, the MST network was constructed by consecutively adding connections with the highest-ranking weight. When adding a new connection resulted in the formation of a loop, this connection was omitted and the next connection in order of weight was added



to the network. This procedure was repeated until all nodes were connected, resulting in a unique MST for each subject with a fixed number of (N) 90 nodes and (M = N-1) 89 links. Hence, no bias was induced due to differences in connection density or strength between subjects. The MST therefore represents the strongest connections in the network (e.g. a maximum spanning tree), and network topology was compared using the MST leaf fraction and MST diameter [32].

A combination of two MST measures, namely the diameter and the leaf fraction can be used to determine if the network's topology is more line-like (i.e., less integrated) or more star-like (i.e., more integrated) network [32]. The MST diameter is calculated as the longest distance (in number of edges) between any two nodes of the MST. The MST leaf fraction, reflecting the number of nodes that only link to one other node (i.e., degree 1). A longer diameter and lower leaf number will reflect a more line-like network, whereas a more integrated star-like network will have a shorter diameter and larger leaf number [32].

### **K-means clustering**

We computed an averaged connectivity matrix per participant group and subtracted the average matrix of healthy controls to obtain three difference matrices. These differences matrices were converted into three vectors, thereby only extracting those connections that were part of the NBS component. The three vectors were entered into a k-means clustering algorithm.

The k-means clustering method is an unsupervised machine learning algorithm that groups data into a pre-specified number of k clusters. We determined the optimal number of according to Madhulatha and colleagues [34], by running the k-means clustering algorithm for k range of values (e.g. 1-10 clusters) and subsequently calculating the sum of squared errors (SSE) at each k. The most favorable balance between a low SSE and low k determines the optimum number of clusters [34]. In this study, the elbow method validated an optimum number of six clusters (Supplementary Figure 4).

### **Effects of age, sex, motion and modality**

Due to the relatively large differences in age and sex between the groups, we tested for possible collinearity. To identify collinearity among variables the variance inflation factor (VIF) was calculated in SPSS 22.0 using linear regression. As a rule of thumb, a VIF > 3 warrants extra checking, and a VIF > 5 means that collinearity is highly likely. To further explore possible effects of age and sex as covariates, we replicated the Network Based Statistics analyses in smaller matched subgroups (without including age and sex as covariates). These smaller subgroups were matched using exact case-control matching in SPSS 20.0.

The residual relationship between subject movement and connectivity was evaluated according to two benchmarks; 1) assess residual relationship between motion and connectivity by estimating the residual QC-FC (quality control / functional connectivity) correlation; 2) estimating distance-dependent effects of motion on connectivity. The QC-FC relationship was computed by correlating the network edge weight of the 90-nodes with the mean relative displacement motion as calculated by MCFLIRT function in FSL [35]. To account for the participant's age and sex, a partial correlation was calculated. This was subsequently used to calculate the number of edges that significantly correlated with subject motion after using the false discovery rate (FDR) [36]. Secondly, distance dependent effects were estimated by correlating the Euclidean distance between the center of each node with the QC-FC correlation. Additional data on the residual relation between motion and functional connectivity is provided in Supplementary Figure 1.

### **Random forest classification algorithm**

The random forest classifier has the advantage that cross-validation is done internally, meaning that no separate test set of participants is needed to estimate the generalized error of the training set [39]. The cross-validation is done internally by out-of-bag (OOB) error estimate. In each bootstrap training sample, one-third of the features are left out and *not* used in assembling the decision tree. As the random forest is built, each tree is tested on features not used in building that tree, termed OOB examples. Each feature that is left out is put down the tree to obtain a classification. At the end of the run, the model predicts the class that received most of the votes every time feature x was OOB, as well as the proportion of time the class is not equal to the original class of feature x. This is averaged over all features resulting in the OOB error estimate [39].

Each feature per classification receives a variable importance (VIMP) score between 0 and 1. This score is computed by the mean decrease in the Gini impurity criterion. This Gini impurity specifies how often a specific feature was selected for a split, and how large its overall discriminative value was for the classification. By adding up the Gini impurity decreases for each feature across all trees in the random forest, the feature importance (i.e. variable) is obtained.

The classification metrics sensitivity, specificity, and accuracy were determined as follows:

|                 |          | True Class              |                         |
|-----------------|----------|-------------------------|-------------------------|
|                 |          | Positive                | Negative                |
| Predicted class | Positive | True<br>Positive<br>TP  | False<br>Positive<br>FP |
|                 | Negative | False<br>Negative<br>FN | True<br>Negative<br>TN  |

$$\begin{array}{ccc}
 \text{Sensitivity} & \text{Specificity} & \text{Accuracy} \\
 \frac{\text{TP}}{\text{TP} + \text{FN}} & \frac{\text{TN}}{\text{FP} + \text{TN}} & \frac{\text{TP} + \text{TN}}{\text{TP} + \text{FP} + \text{FN} + \text{TN}}
 \end{array}$$

For a more complete description of the classification algorithm, see Dauwan and colleagues [36]. The weighted accuracy was calculated according to Chen and colleagues [37] to correct for unequal sample sizes within each classification.

## Supplementary Results

### Subjects

Of all scans collected in the five studies, a subset of 749 participants was selected based on presence of a resting state and anatomical scan. Of these,  $n = 196$  participants were excluded due to missing clinical data, poor imaging, data quality, processing errors, effects of motion, or brain abnormalities reported by the radiologist. See Supplementary Table 1 for a detailed overview of excluded scans per study, and Supplementary Table 2 for an overview of excluded scans per clinical status (e.g. NC-H, SCZ, BD, CTRL). Next, we selected only those participants who experienced lifetime hallucinations, and bipolar patients without any lifetime history of psychotic experiences. We therefore excluded another 69 patients with bipolar-I disorder, and 6 patients with schizophrenia. Exclusion of these scans resulted in a final eligible pool of  $n = 483$  subjects. On average, sex and age differed across the participant groups. Tukey post-hoc tests were conducted to provide more information on the exact differences (see Supplementary Table 3 for post-hoc tests on age, and Supplementary Table 4 for post-hoc tests on sex). Because age and sex differed across the groups, these variables were entered as covariates in the subsequent analyses.

### Effects of age and sex

No significant relationship was present between age and sex was  $\tau = -0.055$ ,  $P = 0.145$ . The collinearity diagnostics between age and sex was  $VIF = 1.000$ ; tolerance = 1.000, indicating a low possibility of collinearity ( $VIF < 3$ ). Age and sex were thus entered as covariates in the analysis. To further explore the effects of age and sex, we also replicated the NBS analyses in smaller matched subgroups, see Supplementary Fig 2. A similar pattern of connectivity disturbances was demonstrated for the non-clinical individuals and patients with schizophrenia. The analysis for patients with bipolar disorder-I was not significant, although a trend was observed ( $P = 0.097$ ). This is probably due to a power problem as this analysis was done in a smaller matched subgroup. We therefore repeated this analysis at a more lenient significance level ( $P < 0.10$ ) which yielded a similar pattern of connectivity disturbances as in the original analyses. The bipolar patients without hallucinations did not show any significant differences with healthy controls, neither at a more lenient significance threshold ( $P > 0.10$ ).

### Effects of motion

The residual relationship between motion and connectivity strength was estimated, revealing that none of the edges was significantly related to motion after FDR correction ( $P < 0.001$ , for all tests). The median QC-FC for healthy controls was 0.07; for patients with schizophrenia 0.06; for patients with bipolar disorder 0.05; and for non-clinical individuals 0.11. These numbers are in correspondence with previous findings on ICA-AROMA by Ciric and colleagues [35]. Distance dependent effects of motion are represented by the correlation displayed in each of the graphs in Supplementary Figure 1. The distance dependent effects. The results demonstrate that the distance dependent effect on motion was minimal for all groups.

### Global connectome disturbances

The groups did not differ in functional connectivity strength ( $F(4) = 1.0$ ;  $P = 0.434$ ), meaning its effects on graph theoretical measures can be considered minimal [30]. None of the hallucination groups differed in terms of global network organization relative to healthy controls, neither in graph theoretical or MST measures ( $P > 0.05$ , FDR corrected).

### Network Based Statistics

The NBS contrasts schizophrenia patients vs healthy controls, and non-clinical individuals vs healthy controls were both tested using a F-test at  $T = 13.0$ ;  $P < 0.05$  at 10,000 permutations. The contrast bipolar-I disorder patients with hallucinations vs healthy controls was tested at  $T = 8.5$ ;  $p < 0.05$  at 10,000 permutations. Differences between bipolar-I disorder patients vs healthy controls was tested at a range of T-thresholds, but did not result in any significant differences at either of the thresholds.

According to Zalesky and colleagues [40], the choice of the T-statistic is somewhat arbitrary, but does not affect the specificity of the results. We therefore choose T-statistics that provided a roughly equal number of connections across the contrasts to facilitate visual comparison of results. All significant connections in the NBS network are displayed in Supplementary Table 6 for patients with bipolar disorder, Supplementary Table 7 for patients with schizophrenia, and Supplementary Table 8 for non-clinical individuals with hallucinations. The results of the overall group comparison of all hallucinating individuals compared to healthy controls are displayed in Supplementary Table 9.

### Conjunction analysis

To test for precise overlap of connections in each of the NBS networks, a conjunction analysis was applied. The connections in the NBS networks of the non-clinical individuals and schizophrenia patients were found to overlap with eight connections, while the non-clinical individuals and schizophrenia patients showed overlap with bipolar-I patients with hallucinations in only one connection (see Supplemental Figure 4 and Supplemental Table 5).

## Supplementary Discussion

### Implication for future research

Connectivity disturbances in areas such as the cingulate gyrus, insula, hippocampal complex, precuneus and language areas suggests involvement of several large-scale networks, including the auditory, attention and task-control networks in the experience of hallucinations. This typical pattern could suggest that sensory areas may not be adequately mediated by higher-order cognitive regions [41]. These findings can be interpreted in light of the bottom-up/top-down explanatory model which proposes that hallucinations may arise from an imbalance between sensory input (bottom-up) and top-down inhibitory control on sensory areas [42-45]. Disruption of bottom-up processing networks could lead to disturbed interpretation of incoming sensory input, causing patients to hallucinate.

For example, the circular inference theory explains the experience of hallucinations in terms of an imbalance between bottom-up and top-down information [46]. Reduced inhibitory control is hypothesized to lead to top-down and bottom-up information being reverberated (i.e. prior beliefs are misinterpreted as sensory observations) [46]. This may fit with the observed increased connectivity between the frontal and temporal area in both schizophrenia patients and non-clinical individuals in this study, as multiple overcounting of the same redundant sensory and prior information means that both areas will be more active at the same time (e.g. resulting in a higher correlation of BOLD signals) than to be expected in controls.

In support of the reduced inhibitory control theory, previous studies demonstrated that patients with schizophrenia have difficulties to suppress irrelevant information as established by various cognitive tasks measuring inhibitory control [47-50]. Similar deficits in inhibitory control were reported in non-clinical individuals with hallucinations [51-52]. Reduced inhibitory control was previously reported for bipolar patients in a manic episode

[53], but to a lesser extent in euthymic states [54]. The bipolar-I disorder patients in the current study were all in euthymic phase at time of scanning. Euthymic bipolar patients have been found to perform intermediate to schizophrenia patients and controls on executive functioning tasks [55]. In all, these findings might point to mild inhibitory problems related to hallucinations, albeit to a lesser extent in bipolar-I disorder patients than schizophrenia patients and non-clinical individuals with hallucinations.

The present findings are correlational, and can therefore not confirm our hypothesis that connectivity between frontal, parietal and cingulate areas relates to inhibitory dysfunction. Future studies could investigate whether these disturbed connections point to inhibitory and excitatory dysfunction by studying global glutamate (Glu) receptor hypofunction (or the N-methyl-d-aspartate receptor (NMDA-R)) and gamma-aminobutyric acid (GABA) transmission related to dysconnectivity profiles [42, 46, 56]. This could for example be done by combining fMRI with 1H-MR spectroscopy (MRS) to measure levels of Glu and GABA functioning in particular areas of the cortex [57].

## References

1. Vreeker, A., *et al.* High educational performance is a distinctive feature of bipolar disorder: a study on cognition in bipolar disorder, schizophrenia patients, relatives and controls. *Psychol Med.* **46**, 807-18 (2016).
2. Scheewe, T.W., *et al.* Exercise therapy, cardiorespiratory fitness and their effect on brain volumes: a randomised controlled trial in patients with schizophrenia and healthy controls. *Eur Neuropsychopharmacol.* **23**, 675-85 (2013).
3. Begemann, M.J., *et al.* Simvastatin augmentation for recent-onset psychotic disorder: A study protocol. *BBA Clin.* **4**, 52-58 (2015).
4. Sommer, I.E., *et al.* Healthy individuals with auditory verbal hallucinations; who are they? Psychiatric assessments of a selected sample of 103 subjects. *Schizophr Bull.* **36**, 633-41 (2010).
5. APA. *Diagnostic and Statistical Manual of Mental Disorders* (4th ed. Text Revision). Washington. (American Psychiatric Association, 2000).
6. First, M., Spitzer, R., Gibbon, M., Williams, J. *Structured Clinical Interview for DSM-IV-TR Axis I Disorders, Research Version, Patient Edition.* (SCID-I/P). New York: Biometrics Research. (New York State Psychiatric Institute; 2002)
7. Lecrubier, Y., *et al.* The Mini International Neuropsychiatric Interview (M.I.N.I.): a short diagnostic structured interview: reliability and validity according to the CIDI. *European Psychiatry.* **12**, 224-231 (1997).
8. Andreasen, N.C., Flaum, M., Arndt, S. The Comprehensive Assessment of Symptoms and History (CASH). An instrument for assessing diagnosis and psychopathology. *Arch Gen Psychiatry.* **49**, 615-23 (1992).
9. Raine, A. The SPQ: a scale for the assessment of schizotypal personality based on DSM-III-R criteria. *Schizophr Bull.* **17**, 555-64 (1991).
10. van Lutterveld, R., *et al.* Cortical thickness in individuals with non-clinical and clinical psychotic symptoms. *Brain.* **137**, 2664-9 (2014).
11. Neggers, S.F., Hermans, E.J., Ramsey, N.F. Enhanced sensitivity with fast three-dimensional blood-oxygen-level-dependent functional MRI: Comparison of SENSE-PRESTO and 2D-EPI at 3T. *NMR Biomed.* **21**, 663-676 (2008).
12. Smith, S.M., *et al.* Advances in functional and structural MR image analysis and implementation as FSL. *NeuroImage.* **23**, 208-19 (2004).
13. Saad, Z.S., *et al.* Trouble at rest: how correlation patterns and group differences become distorted after global signal regression. *Brain connectivity.* **2**, 25-32 (2012).
14. Gotts, S.J., *et al.* The perils of global signal regression for group comparisons: a case study of Autism Spectrum Disorders. *Front. Human. Neurosci.* **12**, 7-356 (2013).
15. Yang, G.J., *et al.* Altered global brain signal in schizophrenia. *Proc. Natl. Acad. Sci. U. S. Am.* **111**, 7438-7443 (2014).
16. Power, J.D., Barnes, K.A., Snyder, A.Z., Schlagger, B.L., Petersen, S.E. Spurious but systematic correlations in functional connectivity MRI networks arise from subject motion. *Neuroimage.* **59**, 2142-2154 (2012).
17. van Dijk, K.R.A., Sabuncu, M.R., Buckner, R.L. The influence of head motion on intrinsic functional MRI. *Neuroimage.* **59**, 431-438 (2012).
18. Satterthwaite, T.D., *et al.* Impact of in-scanner head motion on multiple measures of functional connectivity: relevance for studies of neurodevelopment in youth. *Neuroimage.* **60**, 623-32 (2012).

19. Pruim, R.H., Mennes, M., Buitelaar, J.K., Beckmann, C.F. Evaluation of ICA-AROMA and alternative strategies for motion artifact removal in resting state fMRI. *Neuroimage*. **112**, 278-87 (2015).
20. Pruim, R.H., *et al.* ICA-AROMA: A robust ICA-based strategy for removing motion artifacts from fMRI data. *Neuroimage*. **112**, 267-77 (2015).
21. Tzourio-Mazoyer, B., *et al.* Automated anatomical labeling of activations in SPM using a macroscopic anatomical parcellation of the MNI MRI single-subject brain. *Neuroimage*. **15**, 273–289 (2002).
22. Power, J.D., *et al.* Functional network organization of the human brain. *Neuron*. **72**, 665-678 (2011).
23. Percival, D.B., Walden, A.T. *Wavelet Methods for Time Series Analysis*. (Cambridge University Press; 2000).
24. Grinsted, A., Moore, J.C., Jevrejeva, S. Application of the cross wavelet transform and wavelet coherence to geophysical time series. *Nonlin Processes Geophys*. **11**, 561-566 (2004).
25. Zhang, Z., Telesford, Q.K., Giusti, C., Lim, K.O., Bassett, D.S. Choosing Wavelet Methods, Filters, and Lengths for Functional Brain Network Construction. *PLoS One*. **11**, e0157243 (2016).
26. Fadili, M.J. & Bullmore, E.T. A comparative evaluation of wavelet-based methods for hypothesis testing of brain activation maps. *Neuroimage*. **23**,1112-1128 (2004).
27. Archard, S., Salvador, R., Whitcher, B., Suckling, J., Bullmore, E. A resilient low-frequency, small-world human brain functional network with highly connected association cortical hubs. *J Neurosci*. **26**, 63-72 (2006).
28. Gu, S., *et al.* Emergence of system roles in normative neurodevelopment. *Proc Natl Acad Sci USA*. **112**, 13681-6 (2015).
29. Onnela, J.P., Saramäki, J., Kertész, J., Kaski, K. Intensity and coherence of motifs in weighted complex networks. *Phys Rev E Stat Nonlin Soft Matter Phys*. **71**, 065103 (2005).
30. van Wijk, B.C., Stam, C.J., Daffertshofer, A. Comparing brain networks of different size and connectivity density using graph theory. *PLoS One*. **5**, e13701 (2010).
31. van den Heuvel, M.P., *et al.* Proportional thresholding in resting-state fMRI functional connectivity networks and consequences for patient-control connectome studies: Issues and recommendations. *Neuroimage*. **152**, 437-449 (2017).
32. Stam, C.J., *et al.* The trees and the forest: Characterization of complex brain networks with minimum spanning trees. *Int J Psychophysiol*. **92**,129-38 (2014).
33. Tewarie, P., van Dellen, E., Hillebrand, A., Stam, C.J. The minimum spanning tree: an unbiased method for brain network analysis. *Neuroimage*. **104**, 177-88 (2015).
34. Madhulatha, T.S. An Overview on Clustering Methods. *IOSR Journal of Engineering*. **2**, 719-725 (2012).
35. Jenkinson, M., Bannister, P., Brady, J.M., Smith, S.M. Improved Optimisation for the Robust and Accurate Linear Registration and Motion Correction of Brain Images. *NeuroImage*. **17**, 825-841 (2002).
36. Ciric, R., *et al.* Benchmarking of participant-level confound regression strategies for the control of motion artefact in studies of functional connectivity. *Neuroimage*. **154**, 174-187 (2017).
37. Dauwan, M., *et al.* Random forest to differentiate dementia with Lewy bodies from Alzheimer's disease. *Alzheimers Dement (Amst)*. **19**, 99-106 (2016).
38. Chen, C., Liaw, A., Breiman, L. Using random forest to learn imbalanced data. Dept. Statistics, Univ. California, Berkeley, CA, *Tech. Rep.* **666** (2004).
39. Breiman L, University of California Random forest. *Mach Learn*. **45**, 1–35 (1999).
40. Zalesky, A., Cocchi, L., Fornito, A., Murray, M.M., Bullmore, E. Connectivity differences in brain networks. *Neuroimage*. **60**, 1055-62 (2012).
41. Hugdahl, K. "Hearing voices": Auditory hallucinations as failure of top-down control of bottom-up perceptual processes. *Scandinavian Journal of Psychology*. **50**, 553-560 (2009).
42. Friston, K.J. Models of brain function in neuroimaging. *Annu. Rev. Psychol*. **56**, 57-87 (2005).
43. Fletcher, P.C., Frith, C.D. Perceiving is believing: a Bayesian approach to explaining the positive symptoms of schizophrenia. *Nat Rev Neurosci*. **10**, 48-58 (2009).
44. Powers, A.R., Gancsos, M.G., Finn, E.S., Morgan, P.T., Corlett, P.R. Ketamine-induced hallucinations. *Psychopathology*. **48**, 376–385 (2015).
45. O'Callaghan, C., Kveraga, K., Shine, J.M., Adams, R.B. Jr., Bar, M. Predictions penetrate perception: Converging insights from brain, behaviour and disorder. *Conscious Cogn*. **47**, 63-74 (2017).
46. Jardri, R., Deneve, S. Circular inferences in schizophrenia. *Brain*. **136**, 3227-41 (2013).
47. Waters, F.A., Badcock, J.C., Maybery, M.T., Michie, P.T. Inhibition in schizophrenia: association with auditory hallucinations. *Schizophr Res*. **62**, 275-80 (2003).
48. Badcock, J.C., Mahfouda, S., Maybery, M.T. Hallucinations and inhibitory functioning in healthy young adults with high and low levels of hypomanic personality traits. *Cogn Neuropsychiatry*. **20**, 254-69 (2015).

49. Soriano, M.F., Jiménez, J.F., Román, P., Bajo, M.T. Intentional inhibition in memory and hallucinations: directed forgetting and updating. *Neuropsychology*. **23**, 61–70 (2009).
50. Hugdahl, K., *et al.* Failure of attention focus and cognitive control in schizophrenia patients with auditory verbal hallucinations: evidence from dichotic listening. *Schizophr Res*. **147**, 301–309 (2013).
51. Paulik, G., Badcock, J.C., Maybery, M.T. Poor intentional inhibition in individuals predisposed to hallucinations. *Cogn Neuropsychiatry*. **12**, 457-70 (2007).
52. Daalman K, *et al.* Auditory verbal hallucinations and cognitive functioning in healthy individuals. *Schizophr Res*. **132**, 203-7 (2011).
53. Badcock, J.C., Hugdahl, K. Cognitive mechanisms of auditory verbal hallucinations in psychotic and non-psychotic groups. *Neurosci Biobehav Rev*. **36**, 431-8 (2012).
54. McGrath, J., Scheldt, S., Clair, A. Performance on tests sensitive to impaired executive ability in schizophrenia, mania, and well controls: Acute and subacute phases. *Schizophr Res*. **26**, 127–137 (1997).
55. Larson, E.R., Shear, P.K., Krikorian, R., Welge, J., Strakowski, S.M. Working memory and inhibitory control among manic and euthymic patients with bipolar disorder. *J Int Neuropsychol Soc*. **11**, 163-72 (2005).
56. Corlett, P.R., Frith, C.D., Fletcher, P.C. From drugs to deprivation: a Bayesian framework for understanding models of psychosis. *Psychopharmacology (Berl)*. **206**, 515-30 (2009).
57. Hugdahl, K., *et al.* Glutamate as a mediating transmitter for auditory hallucinations in schizophrenia: a (1)H MRS study. *Schizophr Res*. **161**, 252-60 (2015).
58. Tzourio-Mazoyer, B., *et al.* Automated anatomical labeling of activations in SPM using a macroscopic anatomical parcellation of the MNI MRI single-subject brain. *Neuroimage*. **15**, 273–289 (2002).

**Supplementary Table 1. Reasons of exclusion for scans listed per study<sup>a</sup>.**

| Reason for exclusion               | Studies   |            |           |             |          |
|------------------------------------|-----------|------------|-----------|-------------|----------|
|                                    | Spectrum  | BIG        | TOPFIT    | Simvastatin | UH       |
| No data on lifetime hallucinations | 14        | 4          | 3         | 2           | 1        |
| Radiological exclusions            | 2         | 8          | 0         | 0           | 0        |
| Preprocessing errors               | 9         | 67         | 13        | 1           | 1        |
| Motion outliers                    | 27        | 34         | 7         | 2           | 1        |
| <i>Total</i>                       | <i>52</i> | <i>113</i> | <i>23</i> | <i>5</i>    | <i>3</i> |

<sup>a</sup>The total number of selected scans per study should be taken into account when interpreting these numbers, which are Spectrum n = 133, BIG n = 320, TOPFIT n = 78, Simvastatin n = 11, UH n = 16. Abbreviations: BIG Bipolar Genetics study; TOPFIT The Outcome of Psychosis and Fitness Therapy study; UH Understanding Hallucinations.

**Supplementary Table 2. Reasons of exclusion for scans listed per clinical status<sup>a</sup>.**

| Reason for exclusion               | Clinical status |              |            |             |
|------------------------------------|-----------------|--------------|------------|-------------|
|                                    | SCZ             | BD-I         | NC-H       | HC          |
| No data on lifetime hallucinations | 11              | 0            | 1          | 5           |
| Radiological exclusions            | 1               | 5            | 1          | 2           |
| Preprocessing errors               | 13              | 38           | 1          | 36          |
| Motion outliers                    | 29              | 29           | 5          | 8           |
| <i>Total</i>                       | <i>54</i>       | <i>72</i>    | <i>8</i>   | <i>51</i>   |
| Age, Mean (SD), y                  | 35.2 (11.4)     | 50.26 (12.7) | 45.7 (9.9) | 41.0 (17.3) |

<sup>a</sup>Number of cases with missing clinical status n=11. Number of cases with missing data on age: SCZ-H n = 4; NC-H n = 1;. Abbreviations: SCZ-H schizophrenia with hallucinations; BD-I bipolar-I disorder with and without hallucinations; NC-H non-clinical individuals with hallucinations; HC healthy controls.

**Supplementary Table 3. Post-hoc tests of significant differences in age across the groups<sup>a</sup>.**

| Participants |       | Mean difference | <i>P</i> value |
|--------------|-------|-----------------|----------------|
| HC           | NC-H  | -2.4            | .827           |
|              | SCZ-H | 8.4             | .000*          |
|              | BD-H  | -5.6            | .014*          |
|              | BD    | -11.6           | .000           |
| NC-H         | HC    | 2.4             | .827           |
|              | SCZ-H | 10.8            | .000*          |
|              | BD-H  | -3.2            | .733           |
|              | BD    | -9.2            | .015*          |
| SCZ-H        | HC    | -8.4            | .000*          |
|              | NC-H  | -10.8           | .000*          |
|              | BD-H  | -14.0           | .000*          |
|              | BD    | -20.0           | .000*          |
| BD-H         | HC    | 5.6             | .014*          |
|              | NC-H  | 3.2             | .733           |
|              | SCZ-H | 14.0            | .000*          |
|              | BD    | -6.0            | .129           |
| BD           | HC    | 11.6            | .000*          |
|              | NC-H  | 9.2             | .015*          |
|              | SCZ-H | 20.0            | .000*          |
|              | BD-H  | 6.0             | .129           |

<sup>a</sup>Differences are deemed significant at  $p < 0.05$  (\*indicated with asterisk). Post-hoc tests done using Tukey HSD test. Abbreviations: NC-H individuals with non-clinical hallucinations; BD-H bipolar disorder with lifetime history of hallucinations; BD bipolar disorder without lifetime history of hallucinations; SCZ-H schizophrenia spectrum disorder with hallucinations.



**Supplementary Table 4. Post-hoc tests of significant differences in sex across the groups<sup>a</sup>.**

| Participants |       | Chi-square | P value |
|--------------|-------|------------|---------|
| HC           | NC-H  | 10.7       | .001*   |
|              | SCZ-H | 6.0        | .014*   |
|              | BD-H  | 0.2        | .646    |
|              | BD    | .04        | .840    |
| NC-H         | HC    | 10.7       | .001*   |
|              | SCZ-H | 21.0       | <.001*  |
|              | BD-H  | 8.7        | .010*   |
|              | BD    | 7.5        | .006*   |
| SCZ-H        | HC    | 6.0        | .014*   |
|              | NC-H  | 21.0       | <.001*  |
|              | BD-H  | 5.5        | .019*   |
|              | BD    | 2.1        | .144    |
| BD-H         | HC    | 0.2        | .646    |
|              | NC-H  | 8.7        | .010*   |
|              | SCZ-H | 5.5        | .019*   |
|              | BD    | 0.2        | .622    |
| BD           | HC    | 0.0        | .840    |
|              | NC-H  | 7.5        | .006*   |
|              | SCZ-H | 2.1        | .144    |
|              | BD-H  | 0.2        | .622    |

<sup>a</sup>Differences are deemed significant at  $p < 0.05$  (\*indicated with asterisk). Post-hoc tests done using Chi-square tests. Abbreviations: NC-H individuals with non-clinical hallucinations; BD-H bipolar disorder with lifetime history of hallucinations; BD bipolar disorder without lifetime history of hallucinations; SCZ-H schizophrenia spectrum disorder with hallucinations.

**Supplementary Table 5. Overlapping edges between NC-H, SCZ-H, and BD-H.**

| <b>Diagnoses</b> | <b>Region</b>      | <b>Region</b>   |
|------------------|--------------------|-----------------|
| NC-H and BD-H    | Cuneus L           | Lingual R       |
| NC-H and SCZ-H   | Frontal Inf Oper R | Supramarginal R |
|                  | Insula R           | Supramarginal R |
|                  | Rolandic Oper R    | Supramarginal R |
|                  | Insula L           | Temporal Sup L  |
|                  | Rolandic Oper R    | Temporal Sup L  |
|                  | Rolandic Oper R    | Temporal Mid L  |
|                  | Rolandic Oper R    | Temporal Mid R  |
| SCZ-H and BD-H   | Rolandic Oper R    | Temporal Inf R  |

Note: abbreviations: SCZ-H schizophrenia with hallucinations; BD-H bipolar-I disorder with hallucinations; NC-H non-clinical individuals with hallucinations.

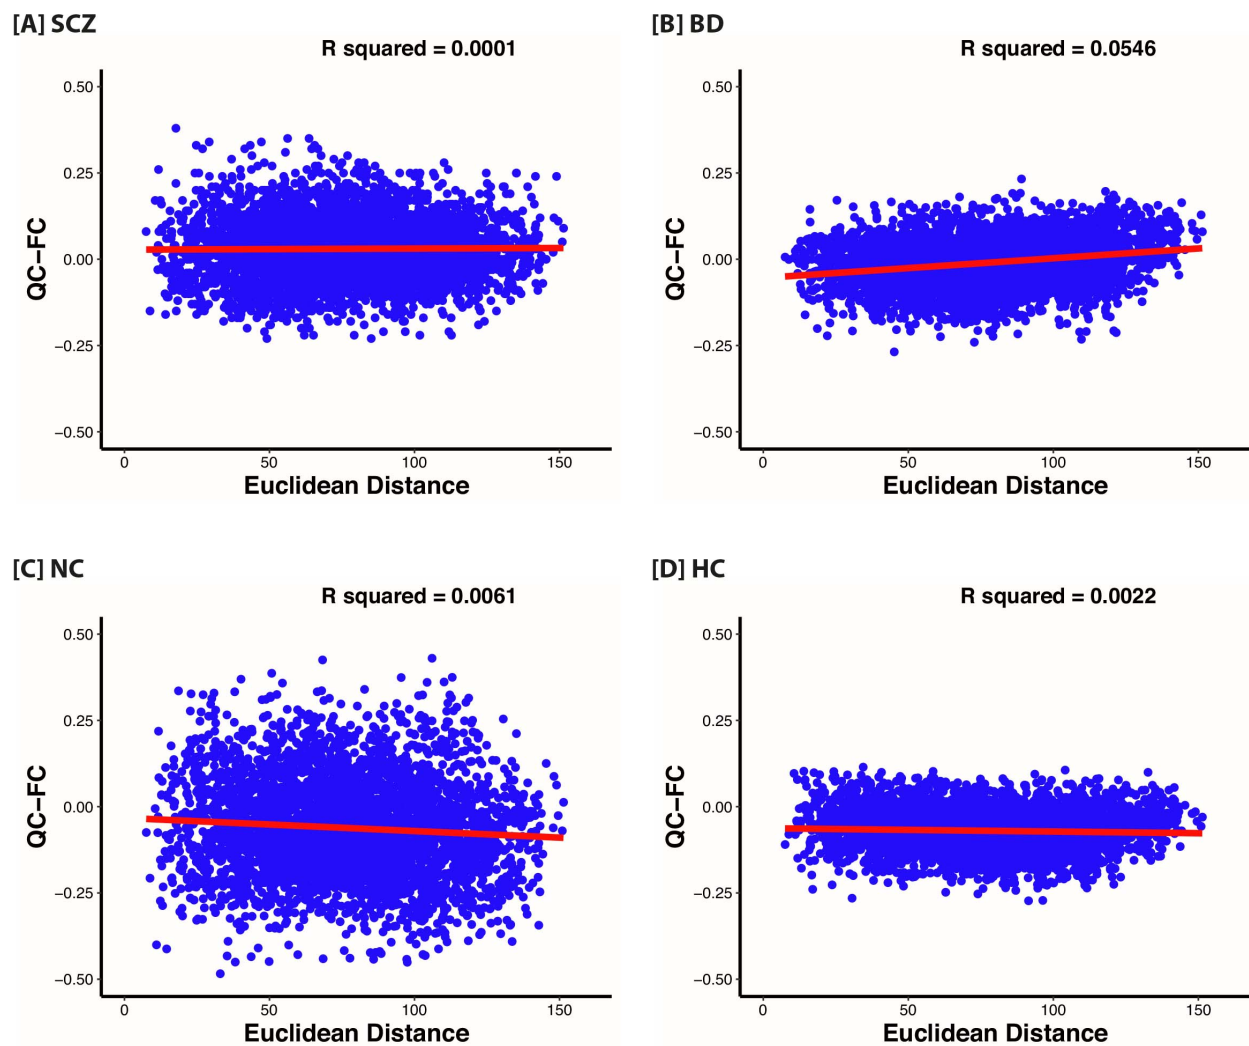

### Supplementary Figure 1. Distance dependent effects of motion on edge strength<sup>a</sup>.

<sup>a</sup>Euclidean distance each pair of nodes was calculated and compared to the QC-FC (quality control / functional connectivity) correlation. The QC-FC relationship was computed by correlating the network edge weight of the 90-nodes of the AAL atlas with the mean relative RMS (root mean square) motion. The distance dependent effect of motion were minimal in all participant groups. Abbreviations: HC healthy controls; NC non-clinical individuals; BD bipolar disorder; SCZ schizophrenia spectrum disorder.

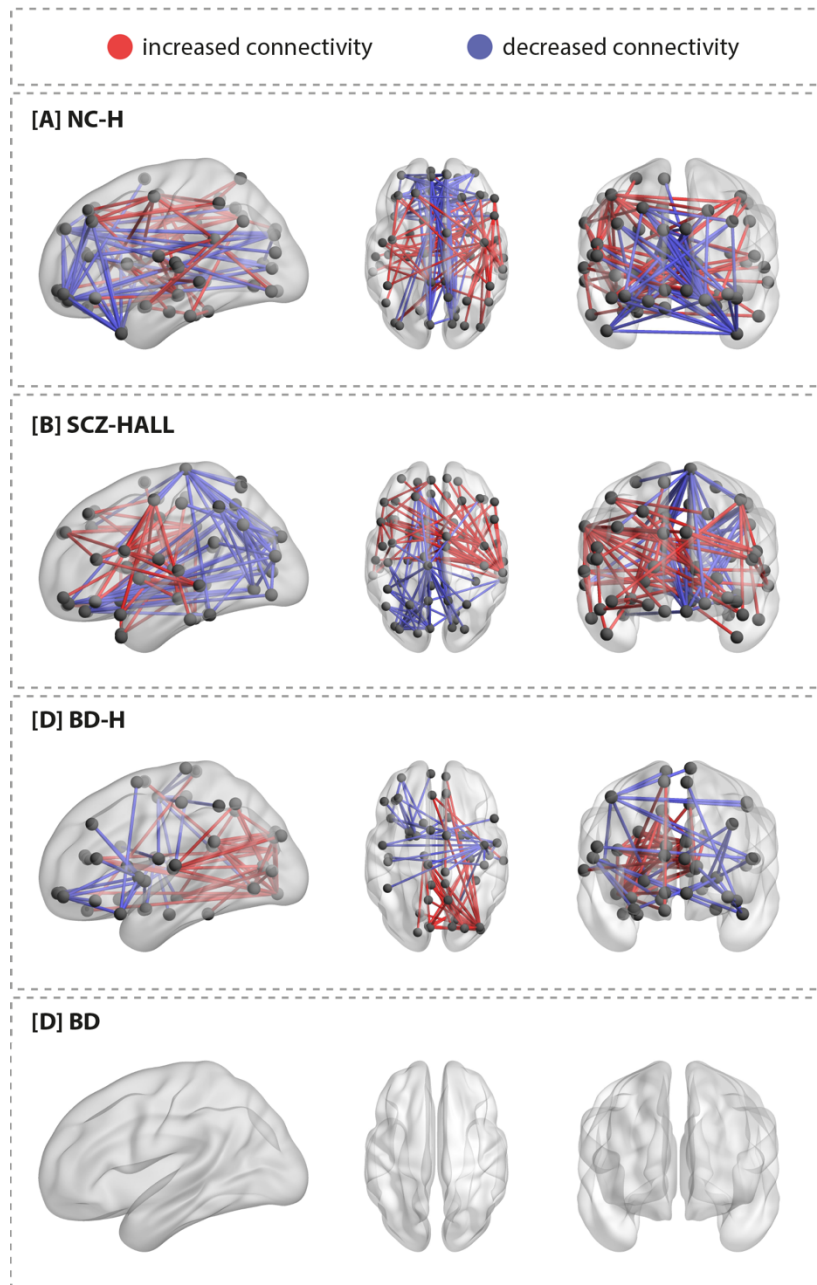

**Supplementary Figure 2. Functional connectome alterations in matched subgroups.**

Results of the Network Based Statistics between: a) non-clinical individuals with hallucinations ( $n = 28$ ) vs healthy controls ( $n = 28$ ); b) schizophrenia patients with hallucinations ( $n = 45$ ) vs healthy controls ( $n = 45$ ); c) bipolar-I disorder patients with lifetime history of hallucinations ( $n = 58$ ) vs healthy controls ( $n = 58$ ). d) bipolar-I disorder patients without a lifetime history of psychosis ( $n = 32$ ) did not differ from controls ( $n = 32$ ). The grey dots represent stereotactic centroids of brain regions defined by the AAL atlas. The edges are color-coded based on either an increase (red) or decrease (blue) in connectivity compared to controls. Group differences were tested at a significance level of  $P < 0.05$  FWE corrected; the BD-H is tested at a more lenient threshold of  $P < 0.10$ . Abbreviations: NC-H individuals with non-clinical hallucinations; BD-H bipolar disorder with lifetime history of hallucinations; SCZ-H schizophrenia spectrum disorder with hallucinations.

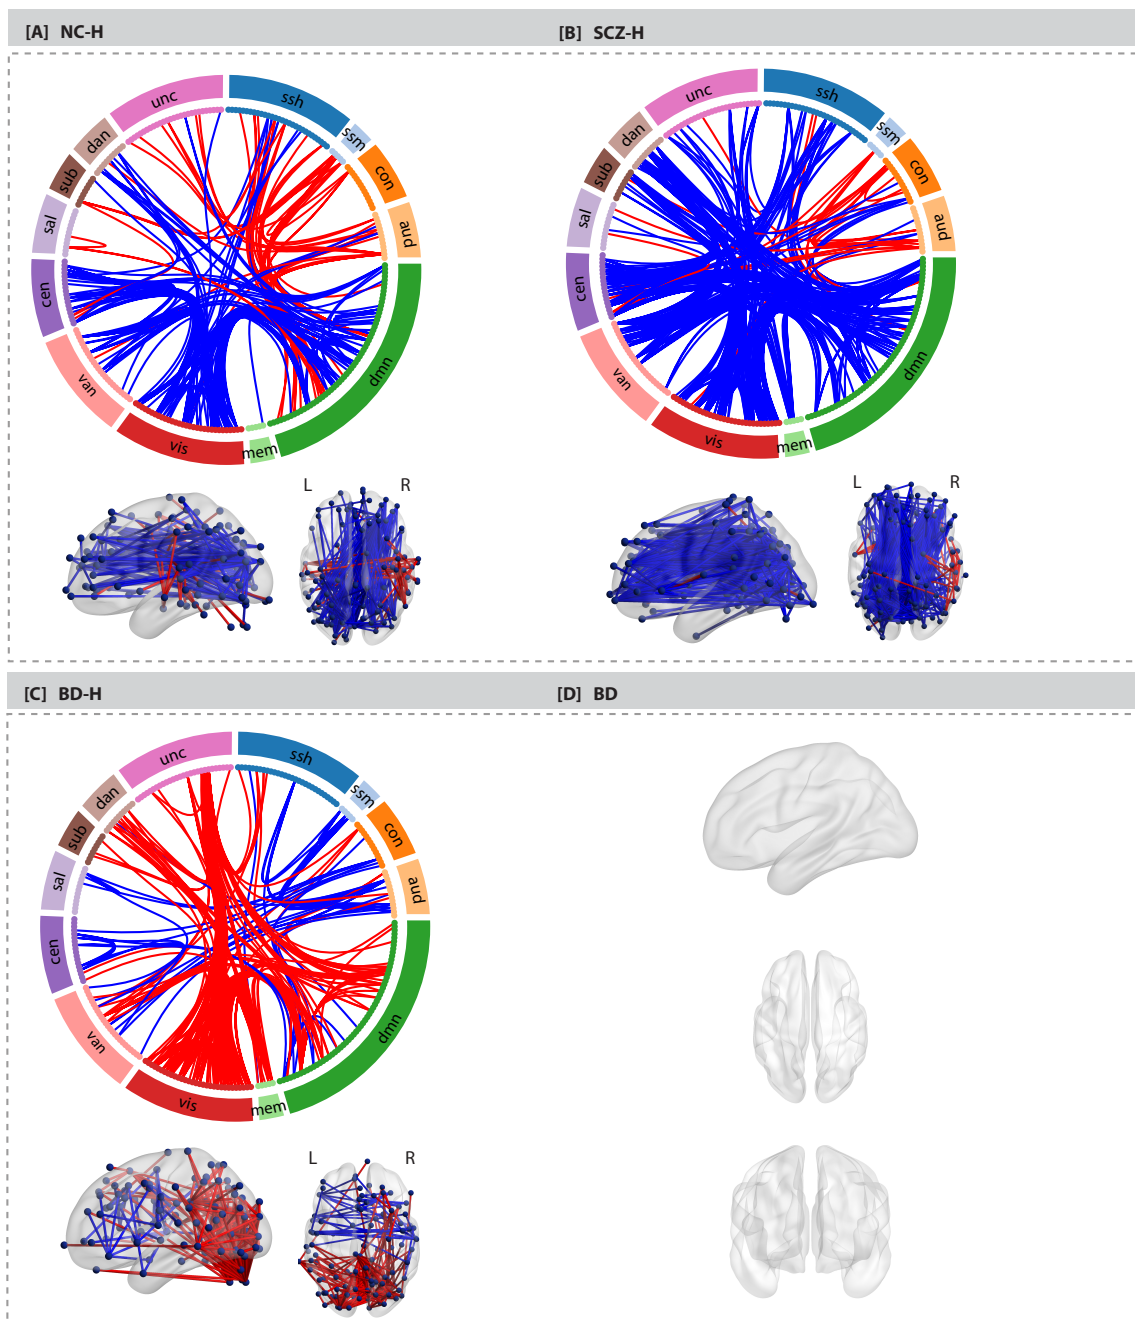

### Supplementary Figure 3. Results of the network based statistics analyses using the Power-260 atlas.

Results of the Network Based Statistics analysis between: a) non-clinical individuals with hallucinations ( $n = 35$ ) vs healthy controls ( $n = 222$ ); b) schizophrenia patients with hallucinations ( $n = 95$ ) vs healthy controls ( $n = 222$ ); c) bipolar-I disorder patients with lifetime history of hallucinations ( $n = 73$ ) vs healthy controls ( $n = 222$ ). d) bipolar-I disorder patients without a lifetime history of psychosis ( $n = 40$ ) did not differ from controls ( $n = 222$ ). The dark blue dots represent stereotactic centroids of brain regions defined by the Power atlas. The edges are color-coded based on either an increase (red) or decrease (blue) in connectivity compared to controls. Group differences were tested at a significance level of  $P < 0.05$  FWE corrected. The corresponding test-statistics, a table with altered connections can be found in the Supplementary Tables 10-12. Abbreviations: AUD auditory network; BD bipolar-I disorder without lifetime history of hallucinations or delusions; BD-H bipolar-I disorder with lifetime history of hallucinations; CEN central-executive network; CER cerebellum; CON cingulo-opercular network; DAN dorsal attention network; DMN default mode network; MEM memory; NC-H individuals with non-clinical hallucinations; SAL salience; SCZ-H schizophrenia spectrum disorder with hallucinations; SSH somatosensory hand; SSM somatosensory mouth; SUB subcortical; VAN ventral attention network; VIS visual.

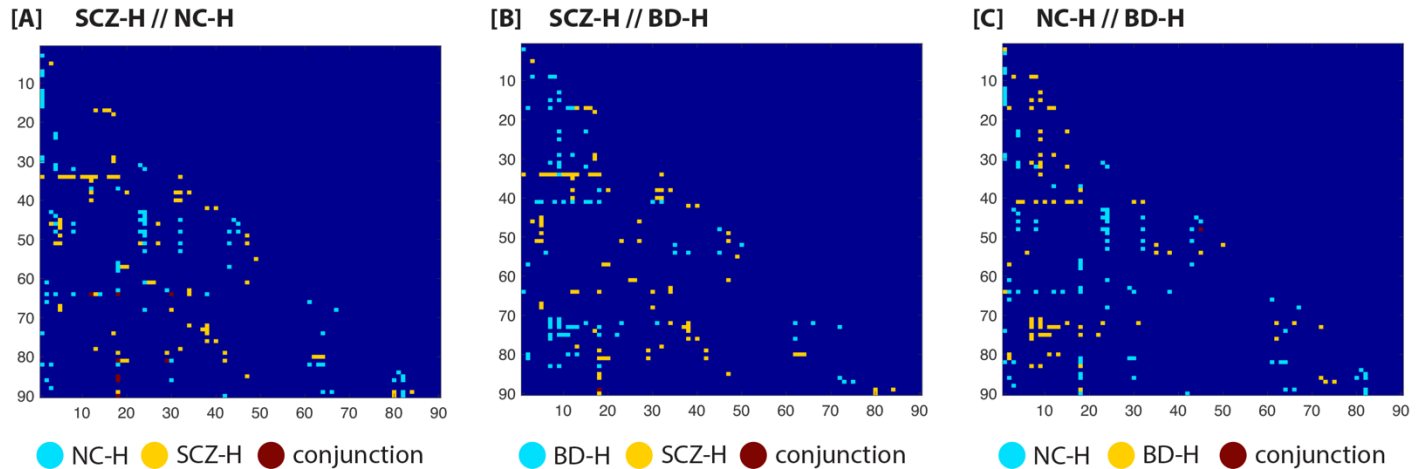

**Supplementary Figure 4. Conjunction analysis on the NBS networks of NC-H, SCZ-H and BD-H.** a) eight overlapping edges were found between NC-H and SCZ-H. b) One overlapping edge was found between BD-H and SCZ-H, c) one edge for NC-H and BD-H. Results are depicted in matrices of the 90 regions of the AAL atlas. Abbreviations: NC-H individuals with non-clinical hallucinations; BD-H bipolar disorder with hallucinations; SCZ-H schizophrenia spectrum disorder with hallucinations.

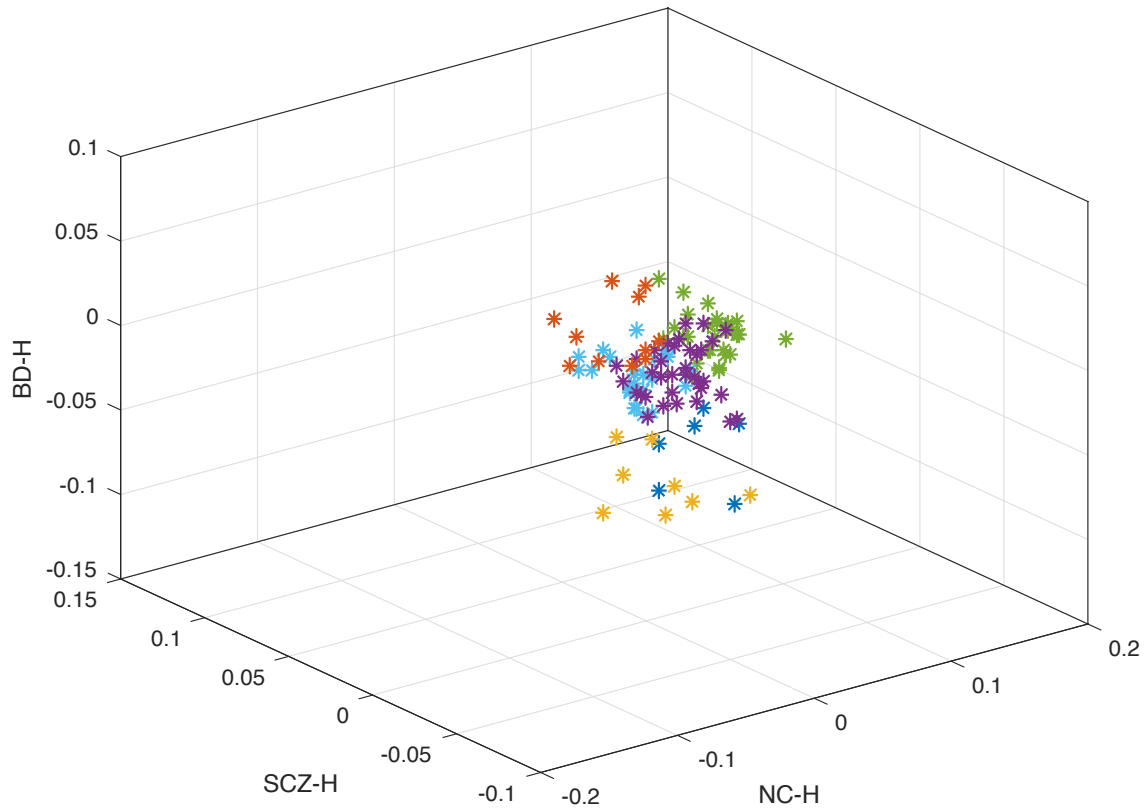

### Supplementary Figure 5. Clusters defined by elbow method for k-means clustering.

Six sets of clusters were validated by the elbow method and entered into the k-means clustering algorithm. After a NBS analysis across the three hallucinating groups (NC-H, SCZ-H, BD-H), those edges that were found to significantly differ in functional connectivity across the three groups, were entered into the k-means clustering algorithm. A list of these edges can be found in Supplementary Table 9. Abbreviations: NC-H individuals with non-clinical hallucinations; BD-H bipolar disorder with lifetime history of hallucinations; SCZ-H schizophrenia spectrum disorder with hallucinations.

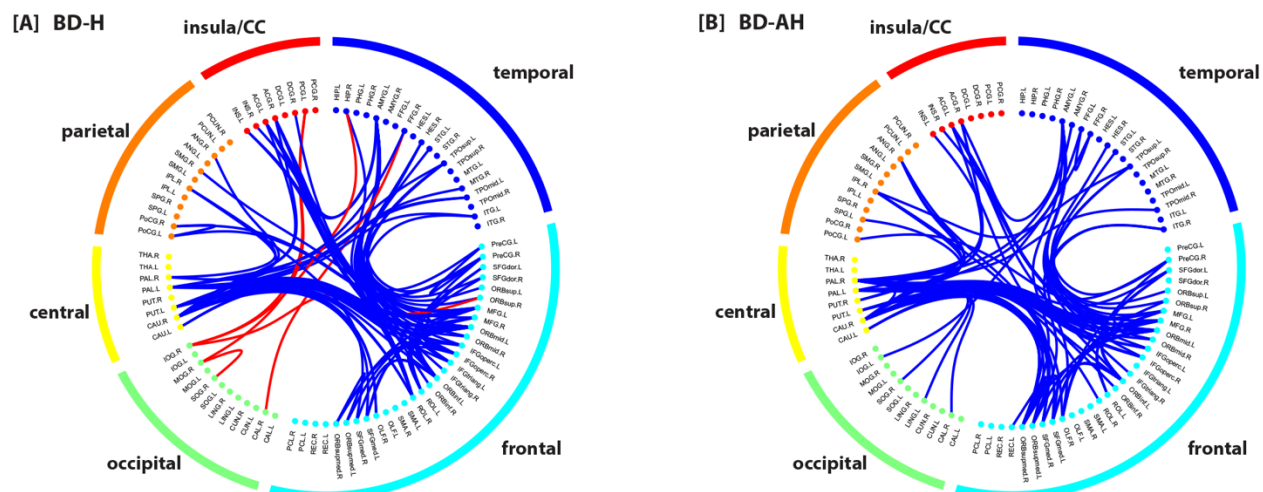

### Supplementary Figure 6. Functional connectome disturbances in BD-H and BD-AH.

Results of the Network Based Statistics between: a) bipolar-I disorder patients with hallucinations in any modality ( $n = 74$ ) vs healthy controls ( $n = 228$ ); b) bipolar-I disorder patients with auditory hallucinations only ( $n = 39$ ) vs healthy controls ( $n = 228$ ). The grey dots represent stereotactic centroids of brain regions defined by the AAL atlas. The edges are color-coded based on either an increase (red) or decrease (blue) in connectivity compared to controls. Group differences were tested at a significance level of  $P < 0.05$  FWE corrected. The corresponding test-statistics for BD-H is  $T = 8.5$ , and for BD-AH  $T = 9.0$ . Abbreviations: BD-AH bipolar-I disorder with lifetime history of auditory hallucinations; BD-H bipolar-I disorder with lifetime history of hallucinations.



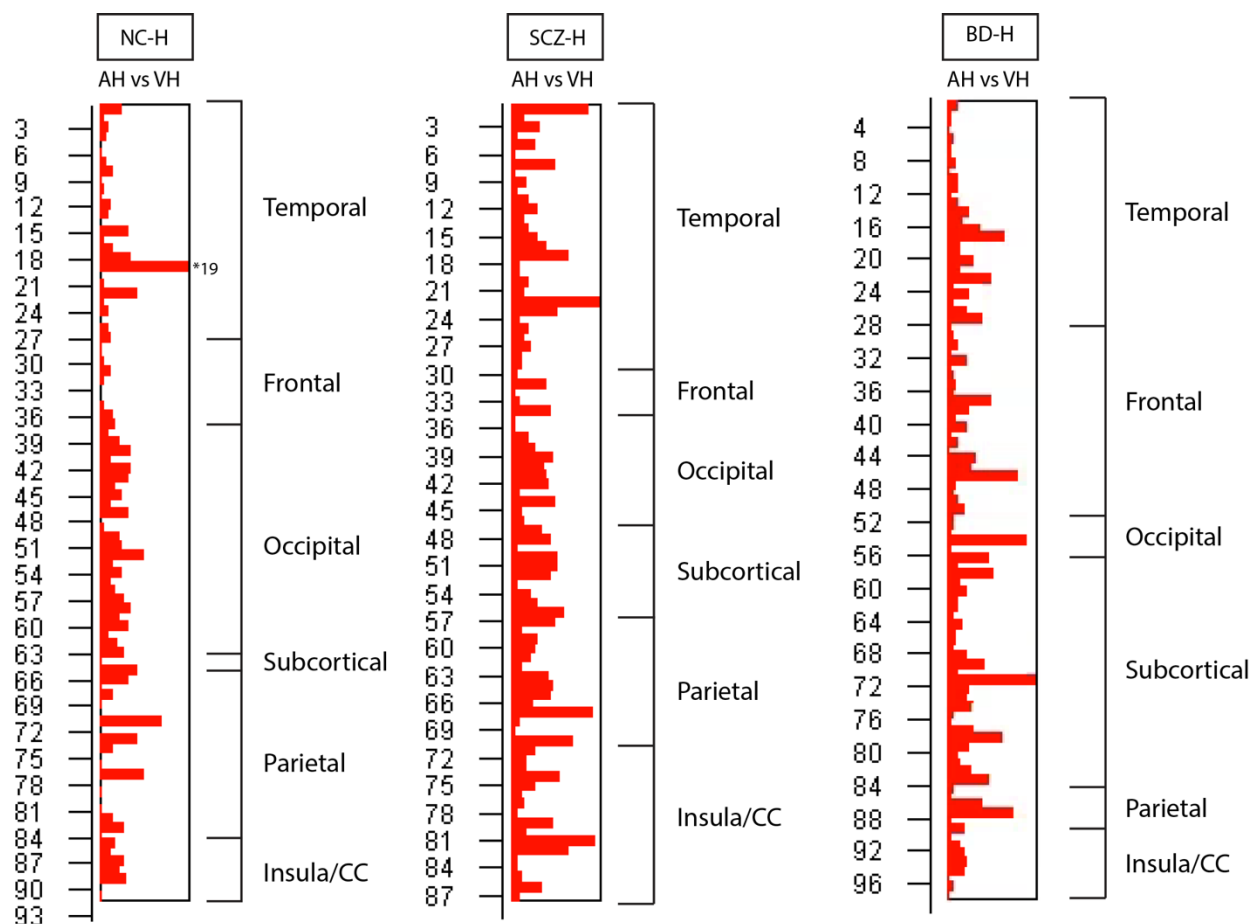

### Supplementary Figure 7. Random forest classification based on the connections of the NBS network.

Variable importance scores in the three main classifications. Features concern all connections that are part of the NBS network of each group comparison, see Supplementary Tables 13 – 15 for the included features. The features are ordered according to the lobes of the brain in which the connections originate. VIMP scores showing the relative importance of features for discrimination between visual versus no visual, or visual versus auditory hallucinations. The red bars indicate the variable importance score (VIMP), which ranges on a scale from 0–1. The numbers in front of the red bars indicate the feature number corresponding to each edge pair presented in Supplementary Tables 13 - 15. The most discriminating feature in the NC-H group is indicated with an asterisk (\*). Sample sizes are NC-H with only auditory hallucinations  $n = 7$  versus NC-H with auditory and visual hallucinations  $n = 33$ ; SCZ-H with only auditory hallucinations  $n = 31$  versus SCZ-H with auditory and visual hallucinations  $n = 53$ ; BD-H with only auditory hallucinations  $n = 14$  versus BD-H with only visual hallucinations  $n = 25$ . Number of cases with missing data: 15 visual hallucinations in SCZ-H; 2 auditory hallucinations in BD-H. Abbreviations: AH auditory hallucinations; BD-H bipolar-I disorder with lifetime history of hallucinations; CC cingulate cortex; NC-H individuals with non-clinical hallucinations; SCZ-H schizophrenia spectrum disorder with hallucinations; VH visual hallucinations.

**Supplementary Table 6. Results of the network based statistics for non-clinical individuals with hallucinations versus healthy controls using the AAL atlas<sup>a</sup>.**

| Non-clinical individuals with hallucinations versus healthy controls |                       |                    |                      |                      |                    |
|----------------------------------------------------------------------|-----------------------|--------------------|----------------------|----------------------|--------------------|
| Region                                                               | Region                | Stats <sup>b</sup> | Region               | Region               | Stats <sup>b</sup> |
| Rolandic Oper R                                                      | Hippocampus L.        | 29.48              | Cinulum Ant R        | Occipital Mid L.     | 15.39              |
| Rolandic Oper R                                                      | Temporal Mid R.       | 26.35              | Precentral R         | Parietal Inf L.      | 15.38              |
| Rolandic Oper R                                                      | SupraMarginal R.      | 26.09              | Cinulum Ant R        | Occipital Inf L.     | 15.31              |
| Rolandic Oper R                                                      | Temporal Mid L.       | 24.91              | Rolandic Oper R      | Postcentral R.       | 15.26              |
| Frontal Sup Medial R                                                 | Cinulum Ant R.        | 24.42              | Temporal Sup R       | Temporal Mid R.      | 15.25              |
| Frontal Sup R                                                        | Frontal Sup Medial R. | 23.02              | Precentral L         | Putamen R.           | 15.19              |
| Precentral L                                                         | Insula L.             | 22.82              | Frontal Sup Medial L | Cinulum Ant L.       | 15.14              |
| Precentral R                                                         | SupraMarginal R.      | 22.31              | Frontal Sup R        | Calcarine R.         | 14.95              |
| Precentral L                                                         | Frontal Sup L.        | 21.94              | Precentral L         | Frontal Mid L.       | 14.73              |
| Precentral L                                                         | Frontal Inf Orb R.    | 21.22              | Amvada R             | Temporal Inf R.      | 14.72              |
| Rolandic Oper R                                                      | Temporal Sup L.       | 21.17              | Temporal Sup R       | Temporal Inf L.      | 14.69              |
| Insula R                                                             | Temporal Sup L.       | 20.84              | Precentral L         | Temporal Sup R.      | 14.64              |
| Insula R                                                             | SupraMarginal R.      | 20.37              | Frontal Sup Medial R | Cuneus R.            | 14.62              |
| Frontal Sup Medial R                                                 | Occipital Inf L.      | 20.21              | Precentral L         | Frontal Inf Oper R.  | 14.60              |
| Calcarine R                                                          | Cuneus L.             | 20.16              | Frontal Sup Medial L | Calcarine L.         | 14.53              |
| Frontal Sup R                                                        | Frontal Sup Medial L. | 20.14              | Frontal Mid R        | Lingual R.           | 14.53              |
| Frontal Sup R                                                        | SupraMarginal R.      | 19.71              | Cuneus L             | Lingual R.           | 14.49              |
| Frontal Sup Medial R                                                 | Calcarine R.          | 19.51              | Cinulum Ant R        | Cuneus L.            | 14.47              |
| Frontal Inf Oper R                                                   | Hippocampus L.        | 19.29              | Precentral L         | Frontal Inf Tri R.   | 14.44              |
| Rolandic Oper R                                                      | SupraMarginal L.      | 19.13              | Frontal Sup Medial R | Occipital Sup L.     | 14.38              |
| Precentral L                                                         | Frontal Inf Orb L.    | 18.46              | Calcarine L          | Postcentral L.       | 14.34              |
| Cuneus L                                                             | Cuneus R.             | 18.45              | Insula L             | SupraMarginal L.     | 14.28              |
| Frontal Sup L                                                        | Temporal Sup R.       | 18.40              | Frontal Inf Tri R    | SupraMarginal R.     | 14.17              |
| Frontal Sup Medial R                                                 | Lingual R.            | 18.24              | Heschl R             | Temporal Mid R.      | 14.10              |
| Precentral R                                                         | Angular R.            | 18.17              | Cinulum Ant R        | Lingual R.           | 14.06              |
| Frontal Sup Medial R                                                 | Occipital Mid L.      | 18.10              | Frontal Sup Medial R | Parietal Inf L.      | 14.05              |
| Frontal Sup Medial R                                                 | Calcarine L.          | 18.08              | Angular R            | Temporal Inf L.      | 14.03              |
| Frontal Mid R                                                        | SupraMarginal R.      | 18.02              | Frontal Sup R        | Cuneus R.            | 13.98              |
| Frontal Inf Oper R                                                   | SupraMarginal R.      | 17.71              | SupraMarginal R      | Temporal Inf L.      | 13.93              |
| Frontal Sup Medial R                                                 | Precuneus R.          | 17.52              | Calcarine L          | Lingual R.           | 13.84              |
| Frontal Sup Medial R                                                 | Cuneus L.             | 17.49              | Frontal Sup Medial L | Lingual R.           | 13.71              |
| Frontal Sup R                                                        | Cinulum Ant R.        | 17.42              | Temporal Sup R       | Temporal Inf R.      | 13.61              |
| Precentral R                                                         | Temporal Mid R.       | 17.24              | Precentral L         | Insula R.            | 13.60              |
| Frontal Sup Medial L                                                 | Cuneus L.             | 16.90              | Temporal Sup L       | Temporal Pole Sup R. | 13.57              |
| SupraMarginal L                                                      | Temporal Sup R.       | 16.61              | Frontal Sup L        | Calcarine L.         | 13.46              |
| Rolandic Oper R                                                      | Postcentral L.        | 16.57              | Parietal Inf L       | Angular R.           | 13.42              |
| Rolandic Oper R                                                      | Temporal Sup R.       | 16.42              | Frontal Sup R        | Cinulum Ant L.       | 13.35              |
| SupraMarginal R                                                      | Temporal Sup R.       | 16.42              | Insula L             | Temporal Sup L.      | 13.30              |
| SupraMarginal R                                                      | Putamen R.            | 16.06              | Rolandic Oper R      | Fusiform R.          | 13.25              |
| Insula R                                                             | Temporal Mid R.       | 15.88              | Frontal Mid R        | Cuneus R.            | 13.21              |
| Precentral L                                                         | Frontal Inf Tri L.    | 15.87              | Parietal Inf L       | Temporal Sup R.      | 13.13              |
| Hippocampus R                                                        | SupraMarginal R.      | 15.87              | Precentral L         | Frontal Mid R.       | 13.12              |
| Precuneus L                                                          | Precuneus R.          | 15.74              | Frontal Mid R        | Cinulum Ant R.       | 13.11              |
| Rolandic Oper R                                                      | Temporal Inf R.       | 15.63              | Frontal Sup L        | Temporal Pole Mid R. | 13.03              |
| Temporal Sup R                                                       | Temporal Mid L.       | 15.54              | Calcarine L          | Occipital Mid L.     | 13.00              |
| Frontal Sup R                                                        | Lingual R.            | 15.51              |                      |                      |                    |

<sup>a</sup>NBS F-test at  $T = 13.0$ ;  $P < 0.05$  with 10,000 permutations, adjusted for multiple comparisons. <sup>b</sup>Stats indicates the T-statistic of significant edges.

**Supplementary Table 7. Results of the network based statistics for schizophrenia patients with hallucinations versus healthy controls using the AAL atlas<sup>a</sup>.**

| Schizophrenia patients with hallucinations versus healthy controls |                    |                    |                      |                    |                    |
|--------------------------------------------------------------------|--------------------|--------------------|----------------------|--------------------|--------------------|
| Region                                                             | Region             | Stats <sup>b</sup> | Region               | Region             | Stats <sup>b</sup> |
| Hippocampus R                                                      | Pallidum R.        | 25.06              | Frontal Inf Oper R   | Hippocampus R.     | 14.98              |
| Rolandic Oper R                                                    | Temporal Mid R.    | 24.22              | Frontal Sup Orb R    | Cingulum Mid R.    | 14.95              |
| ParaHippocampal R                                                  | Amygdala R.        | 23.42              | Rolandic Oper L      | Rolandic Oper R.   | 14.84              |
| Rolandic Oper R                                                    | SupraMarginal R.   | 23.26              | Frontal Sup Orb L    | Occipital Mid L.   | 14.69              |
| Rolandic Oper L                                                    | Insula L.          | 21.78              | Frontal Inf Oper R   | Cingulum Post L.   | 14.58              |
| Rolandic Oper R                                                    | Temporal Inf R.    | 20.97              | Insula L             | Temporal Sup L.    | 14.37              |
| Lingual L                                                          | Occipital Mid L.   | 20.96              | Supp Motor Area R    | Temporal Sup L.    | 14.20              |
| Frontal Inf Oper R                                                 | Cingulum Mid R.    | 20.71              | Rectus L             | Cuneus R.          | 14.10              |
| Frontal Mid L                                                      | Cingulum Mid R.    | 20.06              | Rolandic Oper L      | Putamen R.         | 14.09              |
| Cingulum Mid R                                                     | Hippocampus R.     | 19.93              | Rolandic Oper R      | Temporal Mid L.    | 14.08              |
| Cingulum Ant L                                                     | ParaHippocampal R. | 19.86              | Insula R             | Precuneus R.       | 14.04              |
| Insula L                                                           | Heschl L.          | 19.38              | Frontal Inf Tri L    | Rolandic Oper L.   | 14.01              |
| Rolandic Oper R                                                    | Cingulum Mid R.    | 19.32              | Frontal Inf Tri L    | SupraMarginal R.   | 13.99              |
| Hippocampus R                                                      | Putamen R.         | 19.28              | Frontal Mid R        | Cingulum Mid R.    | 13.97              |
| Frontal Inf Oper L                                                 | Cingulum Mid R.    | 19.14              | Frontal Sup Orb L    | Precuneus R.       | 13.96              |
| Supp Motor Area R                                                  | Postcentral L.     | 18.57              | Frontal Med Orb R    | Parietal Inf L.    | 13.95              |
| SupraMarginal L                                                    | Heschl R.          | 18.32              | Frontal Sup Medial L | Occipital Mid L.   | 13.94              |
| Rolandic Oper L                                                    | Insula R.          | 18.21              | Heschl R             | Temporal Inf R.    | 13.94              |
| Rolandic Oper L                                                    | Cingulum Mid R.    | 17.75              | Cingulum Ant R       | Cingulum Mid R.    | 13.93              |
| Frontal Inf Tri L                                                  | Cingulum Mid R.    | 17.40              | Supp Motor Area R    | Hippocampus R.     | 13.87              |
| Cingulum Mid R                                                     | SupraMarginal L.   | 17.05              | Frontal Sup Orb L    | Lingual L.         | 13.82              |
| Frontal Mid Orb R                                                  | Cingulum Mid R.    | 17.03              | Lingual L            | Occipital Sup L.   | 13.81              |
| Cingulum Ant R                                                     | Thalamus R.        | 16.88              | Heschl R             | Temporal Inf L.    | 13.80              |
| Supp Motor Area L                                                  | Temporal Sup L.    | 16.82              | ParaHippocampal R    | Pallidum R.        | 13.78              |
| Frontal Sup L                                                      | Frontal Sup Orb L. | 16.79              | Frontal Sup L        | Cuneus R.          | 13.73              |
| Frontal Inf Tri L                                                  | Thalamus R.        | 16.79              | Lingual L            | Parietal Inf L.    | 13.55              |
| Frontal Sup Orb L                                                  | Precuneus L.       | 16.71              | Occipital Sup L      | Fusiform L.        | 13.53              |
| Frontal Sup Orb L                                                  | Cingulum Mid R.    | 16.69              | Amygdala R           | Heschl L.          | 13.48              |
| Cingulum Ant R                                                     | ParaHippocampal R. | 16.40              | Temporal Pole Sup R  | Temporal Inf L.    | 13.44              |
| Supp Motor Area L                                                  | Postcentral L.     | 16.28              | Frontal Med Orb L    | Parietal Inf L.    | 13.40              |
| Frontal Inf Orb R                                                  | Rolandic Oper L.   | 16.19              | Frontal Inf Orb R    | Cingulum Mid R.    | 13.39              |
| Hippocampus L                                                      | Putamen L.         | 16.11              | Frontal Inf Oper R   | ParaHippocampal R. | 13.33              |
| Hippocampus R                                                      | Amygdala R.        | 16.10              | Cingulum Mid R       | Caudate R.         | 13.32              |
| Cingulum Ant R                                                     | Hippocampus R.     | 15.79              | SupraMarginal R      | Heschl R.          | 13.32              |
| Rolandic Oper R                                                    | Heschl L.          | 15.69              | Rectus L             | Occipital Mid L.   | 13.28              |
| Parietal Inf R                                                     | Heschl R.          | 15.67              | Insula R             | SupraMarginal R.   | 13.21              |
| Cingulum Ant L                                                     | Hippocampus R.     | 15.51              | Hippocampus R        | Caudate R.         | 13.21              |
| Frontal Sup R                                                      | Occipital Mid L.   | 15.44              | Amygdala R           | Temporal Sup L.    | 13.21              |
| Frontal Sup Orb L                                                  | Cuneus L.          | 15.41              | Rolandic Oper R      | Temporal Inf L.    | 13.17              |
| Frontal Inf Orb L                                                  | Rolandic Oper L.   | 15.38              | Frontal Sup Orb L    | Cuneus R.          | 13.12              |
| Frontal Sup Orb L                                                  | Occipital Sup L.   | 15.34              | Frontal Inf Oper R   | SupraMarginal R.   | 13.12              |
| Rolandic Oper R                                                    | Temporal Sup L.    | 15.30              | Cingulum Mid R       | SupraMarginal R.   | 13.12              |
| Precentral L                                                       | Cingulum Mid R.    | 15.27              | Lingual L            | Temporal Mid L.    | 13.01              |
| Hippocampus R                                                      | Putamen L.         | 15.06              |                      |                    |                    |

<sup>a</sup>NBS F-test at  $T = 13.0$ ;  $P < 0.05$  with 10,000 permutations, adjusted for multiple comparisons. <sup>b</sup>Stats indicates the T-statistic of significant edges.

**Supplementary Table 8. Results of the network based statistics for bipolar-I disorder patients with hallucinations versus healthy controls using the AAL atlas<sup>a</sup>.**

| Bipolar-I disorder patients with hallucinations versus healthy controls |                       |                    |                      |                       |                    |
|-------------------------------------------------------------------------|-----------------------|--------------------|----------------------|-----------------------|--------------------|
| Region                                                                  | Region                | Stats <sup>b</sup> | Region               | Region                | Stats <sup>b</sup> |
| Frontal Sup L                                                           | Frontal Mid Orb L.    | 25.31              | Frontal Mid L        | Caudate L.            | 10.11              |
| Precentral R                                                            | Heschl R.             | 24.24              | Frontal Mid L        | Frontal Inf Orb L.    | 10.06              |
| Frontal Mid Orb L                                                       | Frontal Inf Orb L.    | 22.95              | Frontal Mid Orb R    | Pallidum L.           | 10.02              |
| Precentral R                                                            | Postcentral L.        | 21.81              | Frontal Sup Orb R    | Occipital Inf R.      | 10.00              |
| Frontal Mid Orb L                                                       | Frontal Sup Medial L. | 19.02              | Hippocampus R        | Occipital Inf R.      | 10.00              |
| Frontal Mid Orb L                                                       | Pallidum L.           | 16.99              | Putamen L            | Temporal Pole Mid L.  | 10.00              |
| Frontal Mid L                                                           | Frontal Mid Orb L.    | 16.25              | Frontal Inf Orb L    | Amygdala L.           | 9.93               |
| Frontal Mid R                                                           | Frontal Mid Orb L.    | 16.24              | Frontal Mid L        | Putamen L.            | 9.93               |
| Frontal Mid Orb L                                                       | Temporal Pole Sup L.  | 16.13              | Frontal Mid Orb L    | Cingulum Ant R.       | 9.90               |
| Frontal Mid Orb L                                                       | Cingulum Ant L.       | 15.41              | Rolandic Oper R      | Putamen L.            | 9.88               |
| Frontal Mid Orb L                                                       | Frontal Med Orb L.    | 15.35              | Frontal Mid L        | Rolandic Oper L.      | 9.86               |
| Precentral R                                                            | Rolandic Oper L.      | 15.10              | Caudate R            | Putamen L.            | 9.69               |
| Frontal Inf Oper L                                                      | Putamen L.            | 15.07              | Rolandic Oper R      | Hippocampus R.        | 9.67               |
| Precentral L                                                            | Precentral R.         | 14.52              | Frontal Mid R        | Frontal Inf Orb L.    | 9.66               |
| Frontal Mid Orb L                                                       | Frontal Inf Tri L.    | 14.22              | Precentral R         | Postcentral R.        | 9.57               |
| Frontal Sup Medial L                                                    | Caudate R.            | 13.31              | Rolandic Oper R      | Temporal Pole Sup L.  | 9.57               |
| Cingulum Ant L                                                          | Caudate R.            | 12.80              | Rolandic Oper R      | Temporal Inf L.       | 9.56               |
| Frontal Inf Oper R                                                      | Putamen L.            | 12.50              | Frontal Mid L        | Pallidum R.           | 9.53               |
| Occipital Sup R                                                         | Occipital Mid R.      | 12.49              | Cingulum Post L      | Occipital Mid R.      | 9.43               |
| Frontal Inf Oper R                                                      | Amygdala L.           | 12.39              | Frontal Mid R        | Rolandic Oper L.      | 9.37               |
| Cingulum Ant R                                                          | Amygdala L.           | 12.36              | Frontal Mid L        | Cingulum Ant L.       | 9.36               |
| Frontal Inf Oper L                                                      | Pallidum L.           | 12.36              | Frontal Inf Orb L    | Cingulum Ant L.       | 9.34               |
| Frontal Mid R                                                           | Amygdala L.           | 12.30              | Frontal Inf Oper R   | Rolandic Oper L.      | 9.28               |
| Rolandic Oper R                                                         | Amygdala L.           | 12.26              | Caudate R            | Temporal Mid R.       | 9.25               |
| Frontal Sup Orb L                                                       | Amygdala L.           | 12.25              | Frontal Mid L        | Frontal Med Orb R.    | 9.24               |
| Frontal Inf Tri L                                                       | Putamen L.            | 12.04              | Frontal Inf Orb L    | Frontal Sup Medial R. | 9.20               |
| Frontal Mid L                                                           | Caudate R.            | 11.98              | Frontal Mid Orb R    | Amygdala L.           | 9.20               |
| Rolandic Oper R                                                         | Pallidum L.           | 11.69              | Frontal Mid Orb L    | Cingulum Mid R.       | 9.14               |
| Pallidum L                                                              | Temporal Pole Mid L.  | 11.68              | Olfactory R          | Putamen L.            | 9.13               |
| Frontal Inf Oper L                                                      | Rolandic Oper L.      | 11.46              | Frontal Med Orb L    | Frontal Med Orb R.    | 9.08               |
| Frontal Mid Orb L                                                       | Caudate L.            | 11.44              | Frontal Inf Tri R    | Amygdala L.           | 8.98               |
| Frontal Inf Tri L                                                       | Heschl R.             | 11.44              | Calcarine R          | Fusiform R.           | 8.98               |
| Precentral R                                                            | Temporal Sup L.       | 11.30              | Fusiform R           | Caudate R.            | 8.94               |
| Angular R                                                               | Caudate R.            | 11.28              | Frontal Mid Orb L    | Putamen L.            | 8.94               |
| Parietal Inf R                                                          | Pallidum R.           | 11.27              | Frontal Mid Orb L    | Frontal Med Orb R.    | 8.93               |
| Parietal Inf R                                                          | Caudate R.            | 11.09              | Frontal Mid L        | Pallidum L.           | 8.91               |
| Frontal Mid L                                                           | Temporal Pole Sup L.  | 10.83              | Cingulum Ant R       | Caudate R.            | 8.81               |
| Frontal Mid Orb L                                                       | Caudate R.            | 10.79              | Pallidum L           | Temporal Pole Sup L.  | 8.81               |
| Frontal Mid Orb L                                                       | Insula L.             | 10.78              | Frontal Mid L        | Amygdala L.           | 8.79               |
| Frontal Inf Orb L                                                       | Frontal Sup Medial L. | 10.76              | Frontal Sup Medial R | Parietal Inf R.       | 8.74               |
| Olfactory R                                                             | Pallidum L.           | 10.66              | Frontal Mid Orb L    | Frontal Inf Oper R.   | 8.70               |
| Frontal Sup R                                                           | Amygdala L.           | 10.58              | Frontal Sup Orb R    | Amygdala L.           | 8.62               |
| Frontal Inf Oper L                                                      | Heschl R.             | 10.57              | Frontal Sup R        | Frontal Mid Orb L.    | 8.58               |
| Precentral L                                                            | SupraMarginal R.      | 10.53              | Frontal Sup L        | Frontal Inf Orb L.    | 8.58               |
| Frontal Inf Orb L                                                       | Cingulum Ant R.       | 10.43              | Cingulum Post L      | Occipital Inf R.      | 8.58               |
| Frontal Inf Orb R                                                       | Amygdala L.           | 10.31              | Frontal Inf Oper R   | Pallidum L.           | 8.58               |
| Insula R                                                                | Amygdala L.           | 10.21              | Postcentral L        | Postcentral R.        | 8.51               |
| Frontal Inf Oper R                                                      | Insula L.             | 10.18              | Caudate R            | Temporal Inf L.       | 8.51               |
| Frontal Inf Orb L                                                       | Caudate R.            | 10.13              |                      |                       |                    |

<sup>a</sup>NBS F-test at  $T = 8.5$ ;  $P < 0.05$  with 10,000 permutations, adjusted for multiple comparisons. <sup>b</sup>Stats indicates the T-statistic of significant edges.

**Supplementary Table 9. Results of the network based statistics across all three hallucination groups using the AAL atlas.**

| Comparison across all three hallucination groups |                    |         |                    |                    |         |
|--------------------------------------------------|--------------------|---------|--------------------|--------------------|---------|
| Region                                           | Region             | Cluster | Region             | Region             | Cluster |
| Precentral R                                     | Precentral L       | 1       | Temporal Pole Sup  | SupraMarginal L    | 4       |
| Postcentral L                                    | Precentral R       | 1       | Thalamus R         | Pallidum L         | 4       |
| Postcentral R                                    | Precentral R       | 1       | Temporal Mid R     | Temporal Pole Sup  | 4       |
| Rolandic Oper L                                  | Frontal Inf Oper L | 1       | Frontal Sup L      | Precentral L       | 5       |
| Hippocampus R                                    | Rolandic Oper R    | 1       | Frontal Inf Oper R | Precentral L       | 5       |
| Heschl R                                         | Rolandic Oper R    | 1       | Frontal Inf Tri L  | Precentral L       | 5       |
| Lingual R                                        | Calcarine L        | 2       | Frontal Inf Orb L  | Precentral L       | 5       |
| Occipital Mid L                                  | Calcarine L        | 2       | Frontal Inf Orb R  | Precentral L       | 5       |
| Cuneus L                                         | Calcarine R        | 2       | SupraMarginal R    | Frontal Sup R      | 5       |
| Fusiform R                                       | Calcarine R        | 2       | SupraMarginal R    | Frontal Mid R      | 5       |
| Lingual R                                        | Cuneus L           | 2       | SupraMarginal R    | Frontal Inf Oper R | 5       |
| Occipital Inf R                                  | Cuneus L           | 2       | Temporal Mid R     | Frontal Inf Oper R | 5       |
| Precuneus R                                      | Cuneus L           | 2       | Hippocampus L      | Rolandic Oper R    | 5       |
| Fusiform R                                       | Cuneus R           | 2       | Fusiform R         | Rolandic Oper R    | 5       |
| Occipital Mid L                                  | Lingual L          | 2       | Postcentral L      | Rolandic Oper R    | 5       |
| Occipital Mid L                                  | Occipital Sup L    | 2       | Postcentral R      | Rolandic Oper R    | 5       |
| Precuneus L                                      | Occipital Inf R    | 2       | SupraMarginal L    | Rolandic Oper R    | 5       |
| Cingulum Mid R                                   | Frontal Mid Orb L  | 3       | SupraMarginal R    | Rolandic Oper R    | 5       |
| Putamen L                                        | Frontal Inf Oper L | 3       | Temporal Sup L     | Rolandic Oper R    | 5       |
| Pallidum L                                       | Frontal Inf Oper L | 3       | Temporal Sup R     | Rolandic Oper R    | 5       |
| Heschl R                                         | Frontal Inf Oper L | 3       | Temporal Mid L     | Rolandic Oper R    | 5       |
| Putamen L                                        | Frontal Inf Oper R | 3       | Temporal Mid R     | Rolandic Oper R    | 5       |
| Pallidum L                                       | Frontal Inf Oper R | 3       | Temporal Inf R     | Rolandic Oper R    | 5       |
| Putamen R                                        | Putamen L          | 3       | SupraMarginal L    | Insula L           | 5       |
| Pallidum L                                       | Putamen R          | 3       | SupraMarginal L    | Insula R           | 5       |
| Rolandic Oper L                                  | Frontal Sup L      | 4       | SupraMarginal R    | Insula R           | 5       |
| Heschl R                                         | Frontal Sup L      | 4       | Temporal Sup L     | Insula R           | 5       |
| Temporal Inf L                                   | Frontal Sup L      | 4       | Temporal Sup R     | Insula R           | 5       |
| Rolandic Oper L                                  | Frontal Sup R      | 4       | Temporal Mid R     | Insula R           | 5       |
| Thalamus R                                       | Frontal Sup R      | 4       | SupraMarginal R    | Hippocampus R      | 5       |
| Heschl R                                         | Frontal Mid L      | 4       | Temporal Mid L     | Heschl R           | 5       |
| Temporal Sup L                                   | Frontal Mid L      | 4       | Temporal Pole Sup  | Temporal Sup L     | 5       |
| Rolandic Oper L                                  | Frontal Mid R      | 4       | SupraMarginal R    | Precentral L       | 6       |
| Rolandic Oper L                                  | Frontal Mid Orb L  | 4       | Thalamus R         | Frontal Sup Orb L  | 6       |
| Hippocampus L                                    | Frontal Inf Oper R | 4       | Rolandic Oper L    | Frontal Mid L      | 6       |
| SupraMarginal L                                  | Frontal Inf Oper R | 4       | Cingulum Mid R     | Frontal Mid L      | 6       |
| Heschl R                                         | Frontal Inf Oper R | 4       | SupraMarginal L    | Frontal Mid L      | 6       |
| Temporal Sup L                                   | Frontal Inf Oper R | 4       | SupraMarginal R    | Frontal Mid L      | 6       |
| Heschl R                                         | Frontal Inf Tri L  | 4       | Temporal Inf R     | Frontal Mid R      | 6       |
| Temporal Sup L                                   | Frontal Inf Tri L  | 4       | Temporal Sup L     | Frontal Inf Oper L | 6       |
| Rolandic Oper L                                  | Frontal Inf Tri R  | 4       | Rolandic Oper L    | Frontal Inf Oper R | 6       |
| Cingulum Mid R                                   | Frontal Inf Orb L  | 4       | Cingulum Mid R     | Frontal Inf Oper R | 6       |
| Hippocampus L                                    | Frontal Inf Orb L  | 4       | Hippocampus R      | Frontal Inf Oper R | 6       |
| Thalamus R                                       | Frontal Inf Orb L  | 4       | Thalamus R         | Frontal Inf Oper R | 6       |
| Temporal Sup L                                   | Frontal Inf Orb L  | 4       | Rolandic Oper L    | Frontal Inf Tri L  | 6       |
| Hippocampus L                                    | Frontal Inf Orb R  | 4       | Rolandic Oper L    | Frontal Inf Orb L  | 6       |
| Thalamus R                                       | Frontal Inf Orb R  | 4       | Rolandic Oper L    | Frontal Inf Orb R  | 6       |
| Heschl R                                         | Frontal Inf Orb R  | 4       | Rolandic Oper R    | Rolandic Oper L    | 6       |
| Temporal Sup L                                   | Frontal Inf Orb R  | 4       | Insula R           | Rolandic Oper L    | 6       |
| Occipital Mid R                                  | Rolandic Oper R    | 4       | Cingulum Mid R     | Rolandic Oper R    | 6       |
| Caudate L                                        | Rolandic Oper R    | 4       | Parietal Inf R     | Rolandic Oper R    | 6       |
| Parietal Inf R                                   | Insula L           | 4       | Temporal Inf L     | Rolandic Oper R    | 6       |
| Hippocampus L                                    | Insula R           | 4       | Hippocampus R      | Insula R           | 6       |
| Postcentral R                                    | Insula R           | 4       | Thalamus R         | Insula R           | 6       |
| Putamen L                                        | Hippocampus L      | 4       | Heschl R           | Insula R           | 6       |
| Temporal Pole Sup                                | Hippocampus L      | 4       | Heschl R           | SupraMarginal R    | 6       |
| Heschl R                                         | Occipital Mid R    | 4       | Thalamus R         | Putamen R          | 6       |

**Supplementary Table 10. Results of the network based statistics for non-clinical individuals with hallucinations versus healthy controls using the Power atlas<sup>a</sup>.**

| Non-clinical individuals with hallucinations versus healthy controls |     |       |     |     |       |     |     |       |  |
|----------------------------------------------------------------------|-----|-------|-----|-----|-------|-----|-----|-------|--|
| RSN                                                                  | RSN | Stats | RSN | RSN | Stats | RSN | RSN | Stats |  |
| aud                                                                  | dmn | 33.95 | vis | vis | 15.57 | vis | cen | 13.85 |  |
| dmn                                                                  | dmn | 27.84 | dmn | vis | 15.53 | dmn | dmn | 13.84 |  |
| dmn                                                                  | dmn | 26.79 | ssm | van | 15.50 | vis | vis | 13.84 |  |
| ssh                                                                  | dmn | 26.54 | dmn | dan | 15.48 | vis | vis | 13.84 |  |
| ssm                                                                  | dmn | 25.98 | vis | vis | 15.45 | vis | sal | 13.84 |  |
| unc                                                                  | ssm | 25.22 | aud | vis | 15.43 | vis | vis | 13.83 |  |
| aud                                                                  | dmn | 25.13 | vis | vis | 15.39 | aud | dmn | 13.82 |  |
| vis                                                                  | vis | 24.51 | vis | vis | 15.34 | dmn | sal | 13.82 |  |
| vis                                                                  | cen | 24.32 | aud | unc | 15.28 | dmn | vis | 13.81 |  |
| aud                                                                  | dmn | 21.16 | dmn | dmn | 15.26 | dmn | vis | 13.77 |  |
| aud                                                                  | dmn | 21.11 | dmn | vis | 15.26 | dmn | cen | 13.76 |  |
| ssm                                                                  | con | 21.07 | vis | vis | 15.25 | dmn | vis | 13.74 |  |
| vis                                                                  | vis | 20.87 | ssm | aud | 15.22 | sal | van | 13.73 |  |
| dmn                                                                  | vis | 20.65 | dmn | sal | 15.17 | dmn | vis | 13.72 |  |
| ssh                                                                  | dmn | 20.41 | vis | dan | 15.17 | ssh | vis | 13.71 |  |
| ssh                                                                  | dmn | 20.05 | aud | cen | 15.13 | vis | sal | 13.70 |  |
| dmn                                                                  | dmn | 19.88 | vis | sal | 15.13 | dmn | vis | 13.69 |  |
| dmn                                                                  | vis | 19.85 | ssh | dmn | 15.02 | vis | sal | 13.69 |  |
| con                                                                  | dmn | 19.84 | dmn | cen | 15.01 | dmn | vis | 13.67 |  |
| vis                                                                  | cen | 19.78 | aud | dmn | 15.00 | ssh | vis | 13.66 |  |
| dmn                                                                  | vis | 19.75 | dmn | vis | 15.00 | dmn | dmn | 13.65 |  |
| vis                                                                  | sal | 19.62 | ssh | aud | 14.94 | ssm | dmn | 13.64 |  |
| ssh                                                                  | van | 19.59 | vis | cen | 14.94 | dmn | vis | 13.64 |  |
| vis                                                                  | vis | 19.37 | vis | unc | 14.93 | dmn | dan | 13.64 |  |
| dmn                                                                  | dmn | 19.36 | vis | vis | 14.90 | dmn | vis | 13.63 |  |
| vis                                                                  | sal | 19.23 | vis | cen | 14.90 | dmn | vis | 13.62 |  |
| ssh                                                                  | dmn | 19.07 | dmn | cen | 14.85 | cen | sal | 13.60 |  |
| aud                                                                  | vis | 19.03 | dmn | vis | 14.83 | dmn | dmn | 13.57 |  |
| ssm                                                                  | aud | 18.99 | dmn | vis | 14.81 | dmn | sal | 13.57 |  |
| vis                                                                  | vis | 18.94 | dmn | vis | 14.80 | dmn | unc | 13.53 |  |
| vis                                                                  | vis | 18.77 | dmn | vis | 14.79 | vis | cen | 13.53 |  |
| dmn                                                                  | vis | 18.69 | vis | vis | 14.77 | vis | sal | 13.52 |  |
| dmn                                                                  | vis | 18.55 | dmn | vis | 14.76 | sal | dan | 13.52 |  |
| unc                                                                  | aud | 18.54 | ssm | aud | 14.75 | vis | sal | 13.50 |  |
| vis                                                                  | vis | 18.41 | ssh | unc | 14.73 | vis | sal | 13.50 |  |
| vis                                                                  | vis | 18.21 | dmn | vis | 14.72 | vis | cen | 13.47 |  |
| vis                                                                  | cen | 18.13 | vis | cen | 14.72 | vis | dan | 13.46 |  |
| ssm                                                                  | dmn | 18.03 | cen | sal | 14.71 | dmn | vis | 13.45 |  |
| ssm                                                                  | aud | 18.01 | ssm | van | 14.71 | aud | unc | 13.41 |  |
| cen                                                                  | sal | 17.84 | vis | sal | 14.70 | dmn | vis | 13.39 |  |
| vis                                                                  | sal | 17.83 | dmn | vis | 14.66 | vis | sal | 13.39 |  |
| vis                                                                  | cen | 17.82 | sal | dan | 14.64 | dmn | vis | 13.37 |  |
| vis                                                                  | sal | 17.72 | ssh | dmn | 14.62 | vis | dan | 13.36 |  |
| ssh                                                                  | aud | 17.49 | ssh | vis | 14.62 | dmn | vis | 13.35 |  |
| dmn                                                                  | vis | 17.46 | ssh | dmn | 14.58 | dmn | dan | 13.35 |  |
| cen                                                                  | sal | 17.44 | dmn | sub | 14.57 | dmn | vis | 13.32 |  |
| dmn                                                                  | vis | 17.26 | vis | cen | 14.56 | dmn | vis | 13.32 |  |
| dmn                                                                  | vis | 17.21 | aud | dan | 14.54 | sub | sub | 13.32 |  |

|     |     |       |     |     |       |     |     |       |
|-----|-----|-------|-----|-----|-------|-----|-----|-------|
| unc | ssm | 17.20 | ssm | dmn | 14.52 | vis | sal | 13.29 |
| ssh | dmn | 17.12 | dmn | vis | 14.50 | vis | sal | 13.27 |
| dmn | vis | 17.04 | vis | sal | 14.47 | dmn | vis | 13.25 |
| dmn | cen | 17.00 | dmn | vis | 14.44 | dmn | sal | 13.25 |
| aud | dmn | 16.75 | vis | vis | 14.41 | dmn | dan | 13.24 |
| aud | aud | 16.73 | dmn | vis | 14.39 | ssh | cen | 13.22 |
| vis | vis | 16.66 | sal | sal | 14.37 | cen | sal | 13.22 |
| ssh | dmn | 16.55 | dmn | dmn | 14.36 | dmn | dmn | 13.21 |
| dmn | vis | 16.51 | dmn | vis | 14.32 | dmn | cen | 13.21 |
| vis | vis | 16.51 | con | unc | 14.30 | dmn | vis | 13.20 |
| ssh | ssm | 16.49 | vis | cen | 14.30 | vis | vis | 13.20 |
| ssh | aud | 16.45 | dmn | dmn | 14.25 | con | dmn | 13.19 |
| dmn | dmn | 16.44 | vis | cen | 14.25 | ssm | dmn | 13.18 |
| aud | vis | 16.41 | dmn | vis | 14.21 | vis | sal | 13.16 |
| dmn | vis | 16.34 | vis | sal | 14.18 | dmn | vis | 13.14 |
| dmn | sub | 16.33 | vis | cen | 14.17 | ssh | dmn | 13.13 |
| dmn | mem | 16.22 | dmn | dmn | 14.09 | dmn | cen | 13.11 |
| vis | sal | 16.20 | vis | van | 14.09 | ssh | dmn | 13.09 |
| ssh | dmn | 16.17 | dmn | vis | 14.08 | dmn | vis | 13.08 |
| ssh | sal | 16.16 | vis | cen | 14.01 | vis | sal | 13.08 |
| ssm | dmn | 16.12 | dmn | vis | 14.00 | dmn | dan | 13.08 |
| dmn | vis | 16.09 | vis | dan | 14.00 | dmn | vis | 13.07 |
| vis | cen | 15.96 | ssh | vis | 13.99 | vis | sal | 13.07 |
| ssm | dmn | 15.94 | vis | vis | 13.98 | vis | sal | 13.06 |
| dmn | dmn | 15.89 | vis | cen | 13.98 | dmn | vis | 13.05 |
| vis | dan | 15.82 | vis | vis | 13.97 | cen | sal | 13.05 |
| vis | sal | 15.81 | cen | sal | 13.96 | ssh | ssm | 13.04 |
| dmn | unc | 15.80 | ssm | dmn | 13.95 | vis | vis | 13.04 |
| dmn | dmn | 15.74 | dmn | vis | 13.91 | aud | dmn | 13.03 |
| vis | sal | 15.71 | dmn | sal | 13.89 | ssm | dmn | 13.02 |
| dmn | sal | 15.70 | aud | dmn | 13.88 |     |     |       |

<sup>a</sup>NBS F-test at  $T = 13.0$ ;  $P < 0.05$  with 10,000 permutations, adjusted for multiple comparisons. <sup>b</sup>Stats indicates the T-statistic of significant edges. Abbreviations; AUD auditory network; CEN central-executive network; CER cerebellum; CON cingulo-opercular network; DAN dorsal attention network; DMN default mode network; MEM memory; RSN Resting State Network; SAL salience; SSH somatosensory hand; SSM somatosensory mouth; SUB subcortical; VAN ventral attention network; VIS visual.

**Supplementary Table 11. Results of the network based statistics for schizophrenia patients with hallucinations versus healthy controls using the Power atlas<sup>a</sup>.**

| Schizophrenia patients with hallucinations versus healthy controls |     |       |     |     |       |     |     |       |
|--------------------------------------------------------------------|-----|-------|-----|-----|-------|-----|-----|-------|
| RSN                                                                | RSN | Stats | RSN | RSN | Stats | RSN | RSN | Stats |
| vis                                                                | vis | 34.78 | vis | vis | 16.01 | ssh | dmn | 14.24 |
| dmn                                                                | cen | 29.83 | mem | unc | 16.01 | dmn | vis | 14.24 |
| dmn                                                                | cen | 26.80 | vis | sal | 16.01 | vis | cen | 14.24 |
| con                                                                | aud | 25.70 | sal | sal | 16.00 | vis | cen | 14.23 |
| sal                                                                | unc | 24.79 | vis | cen | 15.92 | ssm | aud | 14.22 |
| vis                                                                | cen | 24.25 | sal | dan | 15.90 | vis | vis | 14.21 |
| dmn                                                                | dmn | 23.91 | dmn | vis | 15.87 | vis | sal | 14.21 |
| unc                                                                | cen | 23.84 | dmn | vis | 15.87 | vis | sal | 14.20 |
| vis                                                                | vis | 23.77 | dmn | cen | 15.87 | dmn | sal | 14.20 |
| cen                                                                | cen | 23.74 | cen | sal | 15.86 | ssh | cen | 14.16 |
| aud                                                                | sub | 23.65 | ssh | cen | 15.85 | dmn | vis | 14.14 |
| aud                                                                | dmn | 23.44 | cen | sal | 15.85 | vis | sal | 14.13 |
| vis                                                                | sal | 23.06 | vis | dan | 15.84 | dmn | vis | 14.11 |
| cen                                                                | dan | 22.76 | cen | dan | 15.80 | dmn | dmn | 14.10 |
| dmn                                                                | cen | 22.72 | vis | cen | 15.77 | vis | van | 14.09 |
| ssh                                                                | cen | 22.11 | cen | dan | 15.75 | sal | dan | 14.09 |
| dmn                                                                | cen | 21.87 | ssh | con | 15.74 | dmn | dmn | 14.06 |
| ssh                                                                | sal | 21.83 | vis | sal | 15.74 | vis | cen | 14.05 |
| dmn                                                                | sal | 21.80 | vis | vis | 15.72 | cen | cen | 14.05 |
| vis                                                                | cen | 21.73 | dmn | vis | 15.72 | dmn | van | 14.05 |
| vis                                                                | sal | 21.33 | con | sal | 15.72 | vis | dan | 14.04 |
| cen                                                                | dan | 21.21 | cen | cen | 15.70 | dmn | cen | 13.99 |
| dmn                                                                | vis | 21.20 | ssh | cen | 15.70 | vis | sal | 13.99 |
| dmn                                                                | sal | 21.19 | vis | vis | 15.69 | ssh | vis | 13.97 |
| dmn                                                                | vis | 20.95 | vis | vis | 15.68 | vis | cen | 13.97 |
| ssh                                                                | cen | 20.75 | vis | cen | 15.66 | vis | sal | 13.97 |
| vis                                                                | vis | 20.73 | unc | dan | 15.66 | vis | vis | 13.96 |
| vis                                                                | cen | 20.55 | sal | dan | 15.66 | ssh | sal | 13.95 |
| vis                                                                | sal | 20.53 | dmn | vis | 15.64 | dmn | vis | 13.94 |
| vis                                                                | sal | 20.52 | vis | cen | 15.64 | dmn | vis | 13.94 |
| vis                                                                | cen | 20.49 | dmn | vis | 15.61 | vis | unc | 13.94 |
| dmn                                                                | vis | 20.39 | sal | sal | 15.60 | dmn | vis | 13.93 |
| vis                                                                | sal | 20.35 | ssh | dmn | 15.58 | vis | sal | 13.93 |
| vis                                                                | cen | 20.11 | vis | vis | 15.57 | mem | sal | 13.93 |
| dmn                                                                | sal | 20.02 | dmn | sal | 15.55 | dmn | vis | 13.92 |
| dmn                                                                | sal | 20.01 | vis | unc | 15.53 | dmn | sal | 13.91 |
| vis                                                                | vis | 19.94 | dmn | dan | 15.51 | cen | cen | 13.90 |
| dmn                                                                | vis | 19.93 | dmn | cen | 15.49 | dmn | cen | 13.89 |
| vis                                                                | unc | 19.92 | cen | sal | 15.49 | dmn | mem | 13.88 |
| dmn                                                                | sal | 19.82 | con | dmn | 15.47 | vis | vis | 13.87 |
| vis                                                                | sal | 19.61 | dmn | vis | 15.47 | vis | cen | 13.86 |
| con                                                                | aud | 19.55 | dmn | sal | 15.46 | vis | vis | 13.85 |
| cen                                                                | sal | 19.54 | ssh | cen | 15.44 | aud | dmn | 13.84 |
| dmn                                                                | sal | 19.52 | vis | cen | 15.43 | dmn | mem | 13.83 |
| dmn                                                                | dan | 19.50 | vis | sal | 15.43 | dmn | dan | 13.83 |
| dmn                                                                | vis | 19.49 | dmn | dmn | 15.41 | dmn | vis | 13.82 |
| vis                                                                | cen | 19.43 | dmn | sal | 15.38 | vis | unc | 13.82 |



|     |     |       |  |     |     |       |  |     |     |       |
|-----|-----|-------|--|-----|-----|-------|--|-----|-----|-------|
| dmn | dan | 19.42 |  | aud | sal | 15.38 |  | sal | dan | 13.82 |
| sal | sal | 19.26 |  | cen | sal | 15.38 |  | vis | cen | 13.81 |
| vis | vis | 19.25 |  | con | cen | 15.34 |  | con | sal | 13.81 |
| dmn | sal | 19.21 |  | dmn | vis | 15.30 |  | dmn | dmn | 13.80 |
| vis | sal | 19.15 |  | dmn | dmn | 15.28 |  | dmn | cen | 13.80 |
| aud | cen | 19.14 |  | vis | vis | 15.28 |  | mem | vis | 13.79 |
| vis | vis | 19.03 |  | vis | van | 15.28 |  | sal | dan | 13.79 |
| sal | dan | 18.96 |  | dmn | vis | 15.26 |  | vis | vis | 13.78 |
| aud | sal | 18.93 |  | unc | aud | 15.24 |  | sal | dan | 13.77 |
| vis | vis | 18.92 |  | dmn | vis | 15.24 |  | aud | sal | 13.75 |
| vis | vis | 18.91 |  | dmn | vis | 15.22 |  | dmn | vis | 13.74 |
| cen | dan | 18.91 |  | sal | dan | 15.21 |  | aud | sal | 13.74 |
| dmn | cen | 18.79 |  | ssh | cen | 15.18 |  | dmn | sal | 13.74 |
| vis | sal | 18.77 |  | ssh | sal | 15.17 |  | ssh | dmn | 13.73 |
| dmn | sal | 18.67 |  | vis | sal | 15.16 |  | vis | vis | 13.71 |
| mem | cen | 18.62 |  | vis | vis | 15.14 |  | ssh | dmn | 13.70 |
| vis | vis | 18.58 |  | vis | van | 15.13 |  | mem | van | 13.70 |
| dmn | vis | 18.55 |  | sal | van | 15.13 |  | dmn | vis | 13.69 |
| vis | vis | 18.51 |  | vis | cen | 15.12 |  | vis | sal | 13.68 |
| dmn | dmn | 18.44 |  | vis | sal | 15.12 |  | dmn | sal | 13.68 |
| vis | vis | 18.44 |  | vis | cen | 15.11 |  | vis | sal | 13.68 |
| vis | vis | 18.40 |  | sal | sub | 15.11 |  | unc | vis | 13.65 |
| dmn | vis | 18.37 |  | dmn | vis | 15.10 |  | cen | sal | 13.65 |
| vis | cen | 18.34 |  | dmn | vis | 15.10 |  | vis | cen | 13.62 |
| dmn | vis | 18.28 |  | vis | vis | 15.10 |  | vis | cen | 13.61 |
| dmn | mem | 18.23 |  | vis | cen | 15.07 |  | dmn | dan | 13.61 |
| vis | cen | 18.18 |  | vis | sal | 15.06 |  | cen | sal | 13.60 |
| dmn | cen | 18.10 |  | dmn | mem | 15.04 |  | dmn | cen | 13.58 |
| cen | sal | 18.08 |  | dmn | vis | 15.04 |  | vis | sal | 13.58 |
| dmn | vis | 18.02 |  | ssh | dmn | 15.03 |  | cen | unc | 13.58 |
| vis | cen | 18.01 |  | vis | vis | 15.03 |  | dmn | sal | 13.57 |
| cen | sal | 17.92 |  | vis | vis | 15.01 |  | vis | sal | 13.57 |
| cen | sal | 17.90 |  | mem | cen | 15.01 |  | ssh | vis | 13.54 |
| dmn | vis | 17.88 |  | dmn | cen | 14.99 |  | dmn | cen | 13.54 |
| vis | cen | 17.88 |  | vis | sal | 14.99 |  | vis | cen | 13.53 |
| dmn | sal | 17.86 |  | dmn | sal | 14.99 |  | dmn | sal | 13.51 |
| dmn | dmn | 17.83 |  | mem | sal | 14.99 |  | vis | sal | 13.51 |
| vis | vis | 17.81 |  | vis | sal | 14.99 |  | dmn | vis | 13.50 |
| vis | sal | 17.77 |  | dmn | cen | 14.97 |  | sub | van | 13.49 |
| vis | cen | 17.74 |  | unc | vis | 14.96 |  | dmn | cen | 13.47 |
| vis | unc | 17.61 |  | vis | vis | 14.95 |  | unc | dan | 13.47 |
| vis | cen | 17.58 |  | vis | vis | 14.94 |  | con | con | 13.45 |
| dmn | vis | 17.54 |  | vis | cen | 14.94 |  | mem | sal | 13.45 |
| dmn | van | 17.52 |  | vis | sal | 14.93 |  | mem | van | 13.44 |
| unc | dmn | 17.51 |  | sal | dan | 14.93 |  | dmn | van | 13.43 |
| vis | vis | 17.51 |  | vis | vis | 14.91 |  | vis | vis | 13.41 |
| dmn | mem | 17.48 |  | dmn | dan | 14.90 |  | vis | cen | 13.41 |
| dmn | vis | 17.42 |  | ssh | sal | 14.83 |  | cen | sal | 13.41 |
| dmn | cen | 17.42 |  | vis | vis | 14.81 |  | dmn | dan | 13.41 |
| vis | dan | 17.42 |  | dmn | cen | 14.81 |  | ssh | dan | 13.40 |
| vis | dan | 17.35 |  | dmn | dan | 14.81 |  | vis | dan | 13.40 |
| con | dmn | 17.30 |  | mem | vis | 14.77 |  | vis | sal | 13.37 |

|     |     |       |     |     |       |     |     |       |
|-----|-----|-------|-----|-----|-------|-----|-----|-------|
| unc | dan | 17.30 | vis | sal | 14.76 | ssh | sal | 13.36 |
| con | con | 17.29 | vis | cen | 14.74 | vis | vis | 13.35 |
| ssh | dmn | 17.28 | vis | vis | 14.73 | cen | sal | 13.35 |
| vis | vis | 17.19 | vis | van | 14.73 | dmn | sal | 13.32 |
| dmn | cen | 17.16 | vis | unc | 14.72 | vis | sal | 13.32 |
| ssh | cen | 17.14 | vis | vis | 14.71 | dmn | vis | 13.31 |
| dmn | cen | 17.13 | dmn | vis | 14.70 | unc | ssh | 13.30 |
| vis | dan | 17.13 | vis | sal | 14.70 | ssh | unc | 13.27 |
| dmn | vis | 17.10 | dmn | vis | 14.69 | dmn | vis | 13.26 |
| vis | sal | 17.05 | dmn | mem | 14.68 | ssh | sal | 13.26 |
| ssh | dmn | 16.99 | dmn | vis | 14.68 | dmn | cen | 13.25 |
| sal | sub | 16.99 | cen | dan | 14.65 | con | aud | 13.24 |
| vis | dan | 16.99 | vis | unc | 14.64 | mem | cen | 13.24 |
| ssh | dmn | 16.98 | vis | dan | 14.62 | vis | dan | 13.23 |
| cen | dan | 16.97 | vis | dan | 14.61 | dmn | vis | 13.22 |
| dmn | dmn | 16.96 | vis | sal | 14.60 | con | aud | 13.21 |
| vis | cen | 16.92 | unc | vis | 14.59 | ssh | dmn | 13.21 |
| vis | dan | 16.92 | dmn | vis | 14.59 | vis | vis | 13.21 |
| vis | vis | 16.91 | vis | cen | 14.58 | dmn | dan | 13.21 |
| vis | sal | 16.90 | ssh | dmn | 14.57 | ssh | sal | 13.20 |
| ssh | vis | 16.88 | ssm | sal | 14.57 | vis | cen | 13.19 |
| dmn | dmn | 16.87 | dmn | vis | 14.56 | vis | sal | 13.18 |
| vis | vis | 16.82 | mem | vis | 14.56 | mem | cen | 13.17 |
| dmn | cen | 16.77 | dmn | dan | 14.56 | dmn | vis | 13.16 |
| vis | cen | 16.77 | vis | vis | 14.55 | dmn | cen | 13.16 |
| mem | vis | 16.72 | unc | dmn | 14.54 | ssh | sal | 13.16 |
| cen | sal | 16.72 | dmn | vis | 14.52 | dmn | vis | 13.15 |
| dmn | sal | 16.72 | vis | cen | 14.50 | ssh | vis | 13.14 |
| dmn | dmn | 16.65 | dmn | cen | 14.49 | vis | cen | 13.14 |
| vis | vis | 16.62 | vis | sal | 14.46 | dmn | dan | 13.14 |
| con | dmn | 16.60 | dmn | dmn | 14.45 | mem | vis | 13.12 |
| sal | van | 16.58 | dmn | sal | 14.45 | vis | cen | 13.12 |
| mem | unc | 16.54 | dmn | sal | 14.44 | dmn | sal | 13.12 |
| mem | sal | 16.50 | dmn | vis | 14.43 | vis | dan | 13.11 |
| vis | dan | 16.50 | dmn | vis | 14.43 | dmn | dan | 13.10 |
| vis | vis | 16.49 | dmn | van | 14.43 | dmn | vis | 13.09 |
| cen | cen | 16.46 | dmn | vis | 14.42 | aud | vis | 13.09 |
| dmn | sal | 16.44 | sal | van | 14.42 | dmn | dan | 13.09 |
| dmn | sal | 16.43 | sal | dan | 14.40 | dmn | vis | 13.08 |
| dmn | cen | 16.41 | vis | cen | 14.39 | ssh | sal | 13.08 |
| vis | cen | 16.40 | vis | cen | 14.39 | dmn | cen | 13.07 |
| cen | sal | 16.33 | vis | dan | 14.37 | mem | cen | 13.07 |
| vis | cen | 16.29 | ssm | con | 14.35 | mem | cen | 13.07 |
| cen | cen | 16.25 | dmn | mem | 14.35 | dmn | sal | 13.07 |
| dmn | dan | 16.25 | dmn | vis | 14.35 | ssm | dmn | 13.06 |
| vis | sal | 16.23 | van | dan | 14.34 | dmn | dmn | 13.06 |
| sal | dan | 16.20 | cen | dan | 14.34 | con | sal | 13.06 |
| vis | vis | 16.17 | dmn | vis | 14.33 | dmn | vis | 13.04 |
| vis | sal | 16.17 | dmn | cen | 14.32 | vis | sal | 13.04 |
| dmn | dan | 16.15 | vis | sal | 14.31 | con | dan | 13.04 |

|     |     |       |  |     |     |       |  |     |     |       |
|-----|-----|-------|--|-----|-----|-------|--|-----|-----|-------|
| dmn | vis | 16.11 |  | dan | dan | 14.31 |  | vis | dan | 13.04 |
| vis | vis | 16.09 |  | dmn | dmn | 14.28 |  | aud | vis | 13.03 |
| con | van | 16.08 |  | vis | vis | 14.27 |  | dmn | cen | 13.03 |
| dmn | sal | 16.07 |  | con | aud | 14.25 |  | dmn | vis | 13.01 |
| ssm | dmn | 16.05 |  | dmn | vis | 14.25 |  | sal | sal | 13.01 |
| dmn | vis | 16.03 |  | vis | van | 14.25 |  |     |     |       |

<sup>a</sup>NBS F-test at  $T = 13.0$ ;  $P < 0.05$  with 10,000 permutations, adjusted for multiple comparisons. <sup>b</sup>Stats indicates the T-statistic of significant edges. Abbreviations; AUD auditory network; CEN central-executive network; CER cerebellum; CON cingulo-opercular network; DAN dorsal attention network; DMN default mode network; MEM memory; RSN Resting State Network; SAL salience; SSH somatosensory hand; SSM somatosensory mouth; SUB subcortical; VAN ventral attention network; VIS visual.

**Supplementary Table 12. Results of the network based statistics for bipolar-I disorder patients with hallucinations versus healthy controls using the Power atlas<sup>a</sup>.**

| Bipolar-I disorder patients with hallucinations versus healthy controls |     |       |     |     |       |     |     |       |
|-------------------------------------------------------------------------|-----|-------|-----|-----|-------|-----|-----|-------|
| RSN                                                                     | RSN | Stats | RSN | RSN | Stats | RSN | RSN | Stats |
| vis                                                                     | unc | 24.89 | vis | unc | 12.25 | dmn | dan | 10.39 |
| vis                                                                     | unc | 23.13 | vis | unc | 12.23 | mem | unc | 10.36 |
| vis                                                                     | unc | 22.90 | vis | vis | 12.19 | ssh | dmn | 10.34 |
| vis                                                                     | unc | 22.18 | unc | cen | 12.19 | con | aud | 10.32 |
| vis                                                                     | unc | 21.96 | mem | vis | 12.07 | unc | dmn | 10.31 |
| vis                                                                     | unc | 21.92 | vis | unc | 12.04 | unc | dan | 10.31 |
| vis                                                                     | unc | 21.80 | mem | dan | 12.04 | con | sub | 10.28 |
| vis                                                                     | unc | 21.01 | mem | unc | 11.99 | vis | unc | 10.27 |
| ssm                                                                     | ssm | 20.21 | vis | vis | 11.83 | con | sal | 10.24 |
| vis                                                                     | unc | 19.42 | sub | sub | 11.82 | dmn | unc | 10.20 |
| vis                                                                     | unc | 19.38 | dmn | sal | 11.73 | dmn | vis | 10.18 |
| vis                                                                     | unc | 19.29 | aud | dmn | 11.71 | vis | vis | 10.18 |
| dmn                                                                     | unc | 19.15 | dmn | dan | 11.68 | dmn | dmn | 10.16 |
| vis                                                                     | vis | 19.03 | cen | sub | 11.64 | unc | van | 10.14 |
| vis                                                                     | unc | 18.85 | ssh | aud | 11.63 | dmn | unc | 10.13 |
| dmn                                                                     | vis | 18.49 | con | dmn | 11.62 | sal | sal | 10.12 |
| vis                                                                     | unc | 17.91 | unc | dan | 11.62 | vis | unc | 10.09 |
| dmn                                                                     | vis | 17.80 | unc | vis | 11.61 | con | sub | 10.04 |
| vis                                                                     | unc | 17.52 | unc | vis | 11.56 | vis | vis | 10.00 |
| dmn                                                                     | vis | 17.29 | dmn | vis | 11.55 | mem | cen | 9.96  |
| vis                                                                     | vis | 17.14 | ssh | unc | 11.52 | vis | vis | 9.94  |
| vis                                                                     | unc | 16.93 | mem | vis | 11.51 | dmn | vis | 9.93  |
| vis                                                                     | unc | 16.33 | dmn | vis | 11.49 | ssm | aud | 9.89  |
| ssm                                                                     | aud | 16.28 | dmn | vis | 11.48 | vis | vis | 9.87  |
| vis                                                                     | vis | 16.25 | ssm | aud | 11.44 | aud | cen | 9.86  |
| mem                                                                     | dan | 16.22 | dmn | cen | 11.41 | dmn | unc | 9.82  |
| dmn                                                                     | vis | 16.15 | dmn | cen | 11.38 | aud | dmn | 9.81  |
| ssm                                                                     | aud | 16.00 | vis | unc | 11.37 | ssm | aud | 9.80  |
| con                                                                     | unc | 15.95 | dmn | vis | 11.36 | cen | sal | 9.77  |
| vis                                                                     | vis | 15.94 | dmn | vis | 11.36 | aud | vis | 9.76  |
| mem                                                                     | dan | 15.90 | vis | unc | 11.32 | dmn | vis | 9.76  |
| dmn                                                                     | vis | 15.84 | dmn | dmn | 11.31 | dmn | vis | 9.75  |
| dmn                                                                     | vis | 15.79 | dmn | unc | 11.30 | mem | vis | 9.75  |
| dmn                                                                     | unc | 15.76 | aud | cen | 11.28 | ssh | mem | 9.70  |
| vis                                                                     | unc | 15.75 | dmn | unc | 11.27 | mem | mem | 9.68  |
| vis                                                                     | unc | 15.60 | dmn | dmn | 11.26 | dmn | vis | 9.67  |
| vis                                                                     | unc | 15.56 | aud | dan | 11.25 | vis | unc | 9.66  |
| mem                                                                     | vis | 15.53 | mem | vis | 11.24 | mem | vis | 9.64  |
| vis                                                                     | unc | 15.48 | dmn | vis | 11.22 | vis | vis | 9.63  |
| dmn                                                                     | vis | 15.39 | dmn | unc | 11.20 | aud | cen | 9.63  |
| mem                                                                     | vis | 15.35 | unc | unc | 11.20 | dmn | unc | 9.63  |
| vis                                                                     | unc | 15.29 | ssm | aud | 11.19 | sal | sal | 9.62  |
| dmn                                                                     | unc | 15.03 | vis | vis | 11.19 | vis | vis | 9.61  |
| dmn                                                                     | unc | 14.89 | dmn | unc | 11.19 | vis | vis | 9.59  |
| mem                                                                     | vis | 14.83 | vis | unc | 11.18 | mem | mem | 9.57  |
| dmn                                                                     | vis | 14.72 | dmn | dmn | 11.16 | dmn | dmn | 9.56  |
| ssh                                                                     | aud | 14.63 | mem | vis | 11.14 | unc | vis | 9.56  |

|     |     |       |  |     |     |       |  |     |     |      |
|-----|-----|-------|--|-----|-----|-------|--|-----|-----|------|
| dmn | vis | 14.61 |  | mem | vis | 11.13 |  | ssh | unc | 9.56 |
| vis | unc | 14.60 |  | vis | unc | 11.13 |  | vis | vis | 9.49 |
| mem | unc | 14.34 |  | vis | cen | 11.13 |  | ssh | unc | 9.49 |
| ssm | aud | 14.25 |  | vis | vis | 11.11 |  | vis | vis | 9.47 |
| ssh | unc | 14.17 |  | ssh | ssm | 11.10 |  | dmn | vis | 9.44 |
| sal | sal | 13.86 |  | aud | cen | 11.04 |  | unc | dan | 9.43 |
| vis | vis | 13.81 |  | dmn | dmn | 11.03 |  | mem | cen | 9.42 |
| dmn | unc | 13.74 |  | vis | unc | 11.03 |  | vis | vis | 9.40 |
| dmn | dmn | 13.70 |  | mem | dan | 10.99 |  | dmn | dan | 9.40 |
| con | cen | 13.68 |  | vis | vis | 10.97 |  | aud | dmn | 9.39 |
| vis | vis | 13.66 |  | vis | unc | 10.97 |  | unc | vis | 9.33 |
| vis | vis | 13.66 |  | ssh | aud | 10.96 |  | ssh | dmn | 9.32 |
| vis | vis | 13.65 |  | vis | unc | 10.95 |  | dmn | unc | 9.32 |
| mem | vis | 13.38 |  | unc | vis | 10.93 |  | mem | unc | 9.32 |
| dmn | unc | 13.37 |  | unc | dan | 10.92 |  | dmn | dmn | 9.31 |
| cen | sal | 13.25 |  | mem | vis | 10.89 |  | unc | cen | 9.31 |
| dmn | vis | 13.24 |  | dmn | vis | 10.88 |  | aud | dmn | 9.30 |
| unc | unc | 13.24 |  | dmn | mem | 10.87 |  | vis | vis | 9.29 |
| dmn | vis | 13.06 |  | ssm | aud | 10.85 |  | aud | cen | 9.29 |
| vis | vis | 12.99 |  | vis | vis | 10.85 |  | dmn | dmn | 9.25 |
| dmn | cen | 12.94 |  | vis | unc | 10.84 |  | vis | vis | 9.22 |
| mem | cen | 12.93 |  | mem | vis | 10.83 |  | dmn | cen | 9.22 |
| mem | dan | 12.92 |  | dmn | dmn | 10.82 |  | vis | van | 9.21 |
| mem | sal | 12.87 |  | vis | dan | 10.80 |  | unc | vis | 9.20 |
| dmn | mem | 12.80 |  | vis | vis | 10.79 |  | dmn | vis | 9.19 |
| cen | sal | 12.79 |  | aud | unc | 10.79 |  | dmn | dmn | 9.17 |
| dmn | dmn | 12.75 |  | ssm | ssm | 10.78 |  | unc | van | 9.16 |
| vis | unc | 12.70 |  | dmn | vis | 10.75 |  | vis | unc | 9.14 |
| vis | cen | 12.68 |  | vis | vis | 10.74 |  | ssh | unc | 9.14 |
| vis | vis | 12.64 |  | vis | vis | 10.73 |  | con | dmn | 9.12 |
| vis | cen | 12.58 |  | dmn | vis | 10.66 |  | vis | dan | 9.12 |
| sal | sal | 12.58 |  | ssh | cen | 10.58 |  | vis | vis | 9.10 |
| sal | sal | 12.56 |  | vis | vis | 10.55 |  | vis | vis | 9.08 |
| dmn | vis | 12.48 |  | vis | vis | 10.55 |  | unc | mem | 9.08 |
| dmn | mem | 12.46 |  | unc | unc | 10.49 |  | mem | unc | 9.06 |
| dmn | vis | 12.44 |  | dmn | unc | 10.47 |  | dmn | sal | 9.04 |
| dmn | cen | 12.44 |  | con | sal | 10.47 |  | dmn | mem | 9.03 |
| dmn | vis | 12.43 |  | con | vis | 10.44 |  | ssh | ssm | 9.01 |
| vis | unc | 12.30 |  | vis | vis | 10.43 |  | dmn | vis | 9.01 |
| aud | dmn | 12.29 |  | dmn | vis | 10.42 |  | dmn | vis | 9.01 |
| ssm | aud | 12.25 |  |     |     |       |  |     |     |      |

<sup>a</sup>NBS F-test at  $T = 12.0$ ;  $P < 0.05$  with 10,000 permutations, adjusted for multiple comparisons. <sup>b</sup>Stats indicates the T-statistic of significant edges. Abbreviations; AUD auditory network; CEN central-executive network; CER cerebellum; CON cingulo-opercular network; DAN dorsal attention network; DMN default mode network; MEM memory; RSN Resting State Network; SAL salience; SSH somatosensory hand; SSM somatosensory mouth; SUB subcortical; VAN ventral attention network; VIS visual.

**Supplementary Table 13. List of features for random forest classifier in non-clinical individuals with hallucinations<sup>a</sup>.**

| Non-clinical individuals with hallucinations versus healthy controls |                      |                      |     |                  |                      |
|----------------------------------------------------------------------|----------------------|----------------------|-----|------------------|----------------------|
| No.                                                                  | Region               | Region               | No. | Region           | Region               |
| 1                                                                    | Fusiform R           | Rolandic Oper R      | 47  | Cuneus R         | Frontal Sup R        |
| 2                                                                    | Hippocampus L        | Frontal Inf Oper R   | 48  | Cuneus R         | Frontal Mid R        |
| 3                                                                    | Hippocampus L        | Rolandic Oper R      | 49  | Cuneus R         | Frontal Sup Medial R |
| 4                                                                    | Temporal Inf L       | SupraMarginal R      | 50  | Cuneus R         | Cuneus L             |
| 5                                                                    | Temporal Inf L       | Angular R            | 51  | Lingual R        | Frontal Sup R        |
| 6                                                                    | Temporal Inf L       | Temporal Sup R       | 52  | Lingual R        | Frontal Mid R        |
| 7                                                                    | Temporal Inf R       | Rolandic Oper R      | 53  | Lingual R        | Frontal Sup Medial L |
| 8                                                                    | Temporal Inf R       | Amygdala R           | 54  | Lingual R        | Frontal Sup Medial R |
| 9                                                                    | Temporal Inf R       | Temporal Sup R       | 55  | Lingual R        | 6 Cingulum Ant R     |
| 10                                                                   | Temporal Mid L       | Rolandic Oper R      | 56  | Lingual R        | Calcarine L          |
| 11                                                                   | Temporal Mid L       | Temporal Sup R       | 57  | Lingual R        | Cuneus L             |
| 12                                                                   | Temporal Mid R       | Precentral R         | 58  | Occipital Inf L  | Frontal Sup Medial R |
| 13                                                                   | Temporal Mid R       | Rolandic Oper R      | 59  | Occipital Inf L  | 6 Cingulum Ant R     |
| 14                                                                   | Temporal Mid R       | 6 Insula R           | 60  | Occipital Mid L  | Frontal Sup Medial R |
| 15                                                                   | Temporal Mid R       | Heschl R             | 61  | Occipital Mid L  | 6 Cingulum Ant R     |
| 16                                                                   | Temporal Mid R       | Temporal Sup R       | 62  | Occipital Mid L  | Calcarine L          |
| 17                                                                   | Temporal Pole Mid R  | Frontal Sup L        | 63  | Occipital Sup L  | Frontal Sup Medial R |
| 18                                                                   | Temporal Pole Sup R  | Temporal Sup L       | 64  | Putamen R        | Precentral L         |
| 19                                                                   | Temporal Sup L       | Rolandic Oper R      | 65  | Putamen R        | SupraMarginal R      |
| 20                                                                   | Temporal Sup L       | 6 Insula L           | 66  | Angular R        | Precentral R         |
| 21                                                                   | Temporal Sup L       | 6 Insula R           | 67  | Angular R        | Parietal Inf L       |
| 22                                                                   | Temporal Sup R       | Precentral L         | 68  | Parietal Inf L   | Precentral R         |
| 23                                                                   | Temporal Sup R       | Frontal Sup L        | 69  | Parietal Inf L   | Frontal Sup Medial R |
| 24                                                                   | Temporal Sup R       | Rolandic Oper R      | 70  | Postcentral L    | Rolandic Oper R      |
| 25                                                                   | Temporal Sup R       | Parietal Inf L       | 71  | Postcentral L    | Calcarine L          |
| 26                                                                   | Temporal Sup R       | SupraMarginal L      | 72  | Postcentral R    | Rolandic Oper R      |
| 27                                                                   | Temporal Sup R       | SupraMarginal R      | 73  | Precuneus R      | Frontal Sup Medial R |
| 28                                                                   | Frontal Inf Oper R   | Precentral L         | 74  | Precuneus R      | Precuneus L          |
| 29                                                                   | Frontal Inf Orb L    | Precentral L         | 75  | SupraMarginal L  | Rolandic Oper R      |
| 30                                                                   | Frontal Inf Orb R    | Precentral L         | 76  | SupraMarginal L  | 6 Insula L           |
| 31                                                                   | Frontal Inf Tri L    | Precentral L         | 77  | SupraMarginal R  | Precentral R         |
| 32                                                                   | Frontal Inf Tri R    | Precentral L         | 78  | SupraMarginal R  | Frontal Sup R        |
| 33                                                                   | Frontal Mid L        | Precentral L         | 79  | SupraMarginal R  | Frontal Mid R        |
| 34                                                                   | Frontal Mid R        | Precentral L         | 80  | SupraMarginal R  | Frontal Inf Oper R   |
| 35                                                                   | Frontal Sup L        | Precentral L         | 81  | SupraMarginal R  | Frontal Inf Tri R    |
| 36                                                                   | Frontal Sup Medial L | Frontal Sup R        | 82  | SupraMarginal R  | Rolandic Oper R      |
| 37                                                                   | Frontal Sup Medial R | Frontal Sup R        | 83  | SupraMarginal R  | 6 Insula R           |
| 38                                                                   | Calcarine L          | Frontal Sup L        | 84  | SupraMarginal R  | Hippocampus R        |
| 39                                                                   | Calcarine L          | Frontal Sup Medial L | 85  | 6 Cingulum Ant L | Frontal Sup R        |
| 40                                                                   | Calcarine L          | Frontal Sup Medial R | 86  | 6 Cingulum Ant L | Frontal Sup Medial L |
| 41                                                                   | Calcarine R          | Frontal Sup R        | 87  | 6 Cingulum Ant R | Frontal Sup R        |
| 42                                                                   | Calcarine R          | Frontal Sup Medial R | 88  | 6 Cingulum Ant R | Frontal Mid R        |
| 43                                                                   | Cuneus L             | Frontal Sup Medial L | 89  | 6 Cingulum Ant R | Frontal Sup Medial R |
| 44                                                                   | Cuneus L             | Frontal Sup Medial R | 90  | 6 Insula L       | Precentral L         |
| 45                                                                   | Cuneus L             | 6 Cingulum Ant R     | 91  | 6 Insula R       | Precentral L         |
| 46                                                                   | Cuneus L             | Calcarine R          |     |                  |                      |

<sup>a</sup>Features are disturbed connections that are part of the NBS network when comparing non-clinical individuals with hallucinations to healthy controls.

**Supplementary Table 14. List of features for random forest classifier in schizophrenia patients with hallucinations<sup>a</sup>.**

| Schizophrenia patients with hallucinations versus healthy controls |                   |                      |     |                 |                    |
|--------------------------------------------------------------------|-------------------|----------------------|-----|-----------------|--------------------|
| No.                                                                | Region            | Region               | No. | Region          | Region             |
| 1                                                                  | Amygdala R        | Hippocampus R        | 45  | Occipital Mid L | Lingual L          |
| 2                                                                  | Amygdala R        | ParaHippocampal R    | 46  | Occipital Sup L | Frontal Sup Orb L  |
| 3                                                                  | Fusiform L        | Occipital Sup L      | 47  | Occipital Sup L | Lingual L          |
| 4                                                                  | Heschl L          | Rolandic Oper R      | 48  | Caudate R       | Cingulum Mid R     |
| 5                                                                  | Heschl L          | Insula L             | 49  | Caudate R       | Hippocampus R      |
| 6                                                                  | Heschl L          | Amygdala R           | 50  | Pallidum R      | Hippocampus R      |
| 7                                                                  | Heschl R          | Parietal Inf R       | 51  | Pallidum R      | ParaHippocampal R  |
| 8                                                                  | Heschl R          | SupraMarginal L      | 52  | Putamen L       | Hippocampus L      |
| 9                                                                  | Heschl R          | SupraMarginal R      | 53  | Putamen L       | Hippocampus R      |
| 10                                                                 | Hippocampus R     | Frontal Inf Oper R   | 54  | Putamen R       | Rolandic Oper L    |
| 11                                                                 | Hippocampus R     | Supp Motor Area R    | 55  | Putamen R       | Hippocampus R      |
| 12                                                                 | Hippocampus R     | Cingulum Ant L       | 56  | Thalamus R      | Frontal Inf Tri L  |
| 13                                                                 | Hippocampus R     | Cingulum Ant R       | 57  | Thalamus R      | Cingulum Ant R     |
| 14                                                                 | Hippocampus R     | Cingulum Mid R       | 58  | Parietal Inf L  | Frontal Med Orb L  |
| 15                                                                 | ParaHippocampal R | Frontal Inf Oper R   | 59  | Parietal Inf L  | Frontal Med Orb R  |
| 16                                                                 | ParaHippocampal R | Cingulum Ant L       | 60  | Parietal Inf L  | Lingual L          |
| 17                                                                 | ParaHippocampal R | Cingulum Ant R       | 61  | Postcentral L   | Supp Motor Area L  |
| 18                                                                 | Temporal Inf L    | Rolandic Oper R      | 62  | Postcentral L   | Supp Motor Area R  |
| 19                                                                 | Temporal Inf L    | Heschl R             | 63  | Precuneus L     | Frontal Sup Orb L  |
| 20                                                                 | Temporal Inf L    | Temporal Pole Sup R  | 64  | Precuneus R     | Frontal Sup Orb L  |
| 21                                                                 | Temporal Inf R    | Rolandic Oper R      | 65  | Precuneus R     | Insula R           |
| 22                                                                 | Temporal Inf R    | Heschl R             | 66  | SupraMarginal L | Cingulum Mid R     |
| 23                                                                 | Temporal Mid L    | Rolandic Oper R      | 67  | SupraMarginal R | Frontal Inf Oper R |
| 24                                                                 | Temporal Mid L    | Lingual L            | 68  | SupraMarginal R | Frontal Inf Tri L  |
| 25                                                                 | Temporal Mid R    | Rolandic Oper R      | 69  | SupraMarginal R | Rolandic Oper R    |
| 26                                                                 | Temporal Sup L    | Rolandic Oper R      | 70  | SupraMarginal R | Insula R           |
| 27                                                                 | Temporal Sup L    | Supp Motor Area L    | 71  | SupraMarginal R | Cingulum Mid R     |
| 28                                                                 | Temporal Sup L    | Supp Motor Area R    | 72  | Cingulum Mid R  | Precentral L       |
| 29                                                                 | Temporal Sup L    | Insula L             | 73  | Cingulum Mid R  | Frontal Sup Orb L  |
| 30                                                                 | Temporal Sup L    | Amygdala R           | 74  | Cingulum Mid R  | Frontal Sup Orb R  |
| 31                                                                 | Frontal Sup Orb L | Frontal Sup L        | 75  | Cingulum Mid R  | Frontal Mid L      |
| 32                                                                 | Rolandic Oper L   | Frontal Inf Tri L    | 76  | Cingulum Mid R  | Frontal Mid R      |
| 33                                                                 | Rolandic Oper L   | Frontal Inf Orb L    | 77  | Cingulum Mid R  | Frontal Mid Orb R  |
| 34                                                                 | Rolandic Oper L   | Frontal Inf Orb R    | 78  | Cingulum Mid R  | Frontal Inf Oper L |
| 35                                                                 | Rolandic Oper R   | Rolandic Oper L      | 79  | Cingulum Mid R  | Frontal Inf Oper R |
| 36                                                                 | Cuneus L          | Frontal Sup Orb L    | 80  | Cingulum Mid R  | Frontal Inf Tri L  |
| 37                                                                 | Cuneus R          | Frontal Sup L        | 81  | Cingulum Mid R  | Frontal Inf Orb R  |
| 38                                                                 | Cuneus R          | Frontal Sup Orb L    | 82  | Cingulum Mid R  | Rolandic Oper L    |
| 39                                                                 | Cuneus R          | Rectus L             | 83  | Cingulum Mid R  | Rolandic Oper R    |
| 40                                                                 | Lingual L         | Frontal Sup Orb L    | 84  | Cingulum Mid R  | Cingulum Ant R     |
| 41                                                                 | Occipital Mid L   | Frontal Sup R        | 85  | Cingulum Post L | Frontal Inf Oper R |
| 42                                                                 | Occipital Mid L   | Frontal Sup Orb L    | 86  | Insula L        | Rolandic Oper L    |
| 43                                                                 | Occipital Mid L   | Frontal Sup Medial L | 87  | Insula R        | Rolandic Oper L    |
| 44                                                                 | Occipital Mid L   | Rectus L             |     |                 |                    |

<sup>a</sup>Features are disturbed connections that are part of the NBS network when comparing schizophrenia patients with hallucinations to healthy controls.

**Supplementary Table 15. List of features for random forest classifier in bipolar-I disorder patients with hallucinations<sup>a</sup>.**

| Bipolar-I disorder patients with hallucinations versus healthy controls |                    |                    |    |                 |                    |
|-------------------------------------------------------------------------|--------------------|--------------------|----|-----------------|--------------------|
| No                                                                      | Region             | Region             | No | Region          | Region             |
| 1                                                                       | Amygdala L         | Frontal Sup R      | 50 | Rolandic Oper   | Frontal Inf Oper L |
| 2                                                                       | Amygdala L         | Frontal Sup Orb L  | 51 | Rolandic Oper   | Frontal Inf Oper R |
| 3                                                                       | Amygdala L         | Frontal Sup Orb    | 52 | Occipital Inf R | Frontal Sup Orb R  |
| 4                                                                       | Amygdala L         | Frontal Mid L      | 53 | Occipital Inf R | Cingulum Post L    |
| 5                                                                       | Amygdala L         | Frontal Mid R      | 54 | Occipital Inf R | Hippocampus R      |
| 6                                                                       | Amygdala L         | Frontal Mid Orb R  | 55 | Occipital Mid R | Cingulum Post L    |
| 7                                                                       | Amygdala L         | Frontal Inf Oper   | 56 | Occipital Mid R | Occipital Sup R    |
| 8                                                                       | Amygdala L         | Frontal Inf Tri R  | 57 | Caudate L       | Frontal Mid L      |
| 9                                                                       | Amygdala L         | Frontal Inf Orb L  | 58 | Caudate L       | Frontal Mid Orb L  |
| 10                                                                      | Amygdala L         | Frontal Inf Orb R  | 59 | Caudate R       | Frontal Mid L      |
| 11                                                                      | Amygdala L         | Rolandic Oper R    | 60 | Caudate R       | Frontal Mid Orb L  |
| 12                                                                      | Amygdala L         | Insula R           | 61 | Caudate R       | Frontal Inf Orb L  |
| 13                                                                      | Amygdala L         | Cingulum Ant R     | 62 | Caudate R       | Frontal Sup Medial |
| 14                                                                      | Fusiform R         | Calcarine R        | 63 | Caudate R       | Cingulum Ant L     |
| 15                                                                      | Heschl R           | Precentral R       | 64 | Caudate R       | Cingulum Ant R     |
| 16                                                                      | Heschl R           | Frontal Inf Oper L | 65 | Caudate R       | Fusiform R         |
| 17                                                                      | Heschl R           | Frontal Inf Tri L  | 66 | Caudate R       | Parietal Inf R     |
| 18                                                                      | Hippocampus R      | Rolandic Oper R    | 67 | Caudate R       | Angular R          |
| 19                                                                      | Temporal Inf L     | Rolandic Oper R    | 68 | Pallidum L      | Frontal Mid L      |
| 20                                                                      | Temporal Inf L     | Caudate R          | 69 | Pallidum L      | Frontal Mid Orb L  |
| 21                                                                      | Temporal Mid R     | Caudate R          | 70 | Pallidum L      | Frontal Mid Orb R  |
| 22                                                                      | Temporal Pole Mid  | Putamen L          | 71 | Pallidum L      | Frontal Inf Oper L |
| 23                                                                      | Temporal Pole Mid  | Pallidum L         | 72 | Pallidum L      | Frontal Inf Oper R |
| 24                                                                      | Temporal Pole Sup  | Frontal Mid L      | 73 | Pallidum L      | Rolandic Oper R    |
| 25                                                                      | Temporal Pole Sup  | Frontal Mid Orb L  | 74 | Pallidum L      | Olfactory R        |
| 26                                                                      | Temporal Pole Sup  | Rolandic Oper R    | 75 | Pallidum R      | Frontal Mid L      |
| 27                                                                      | Temporal Pole Sup  | Pallidum L         | 76 | Pallidum R      | Parietal Inf R     |
| 28                                                                      | Temporal Sup L     | Precentral R       | 77 | Putamen L       | Frontal Mid L      |
| 29                                                                      | Frontal Inf Oper R | Frontal Mid Orb L  | 78 | Putamen L       | Frontal Mid Orb L  |
| 30                                                                      | Frontal Inf Orb L  | Frontal Sup L      | 79 | Putamen L       | Frontal Inf Oper L |
| 31                                                                      | Frontal Inf Orb L  | Frontal Mid L      | 80 | Putamen L       | Frontal Inf Oper R |
| 32                                                                      | Frontal Inf Orb L  | Frontal Mid R      | 81 | Putamen L       | Frontal Inf Tri L  |
| 33                                                                      | Frontal Inf Orb L  | Frontal Mid Orb L  | 82 | Putamen L       | Rolandic Oper R    |
| 34                                                                      | Frontal Inf Tri L  | Frontal Mid Orb L  | 83 | Putamen L       | Olfactory R        |
| 35                                                                      | Frontal Med Orb L  | Frontal Mid Orb L  | 84 | Putamen L       | Caudate R          |
| 36                                                                      | Frontal Med Orb R  | Frontal Mid L      | 85 | Parietal Inf R  | Frontal Sup Medial |
| 37                                                                      | Frontal Med Orb R  | Frontal Mid Orb L  | 86 | Postcentral L   | Precentral R       |
| 38                                                                      | Frontal Med Orb R  | Frontal Med Orb    | 87 | Postcentral R   | Precentral R       |
| 39                                                                      | Frontal Mid Orb L  | Frontal Sup L      | 88 | Postcentral R   | Postcentral L      |
| 40                                                                      | Frontal Mid Orb L  | Frontal Sup R      | 89 | SupraMarginal   | Precentral L       |
| 41                                                                      | Frontal Mid Orb L  | Frontal Mid L      | 90 | Cingulum Ant L  | Frontal Mid L      |
| 42                                                                      | Frontal Mid Orb L  | Frontal Mid R      | 91 | Cingulum Ant L  | Frontal Mid Orb L  |
| 43                                                                      | Frontal Sup Medial | Frontal Mid Orb L  | 92 | Cingulum Ant L  | Frontal Inf Orb L  |
| 44                                                                      | Frontal Sup Medial | Frontal Inf Orb L  | 93 | Cingulum Ant R  | Frontal Mid Orb L  |
| 45                                                                      | Frontal Sup Medial | Frontal Inf Orb L  | 94 | Cingulum Ant R  | Frontal Inf Orb L  |
| 46                                                                      | Precentral R       | Precentral L       | 95 | Cingulum Mid    | Frontal Mid Orb L  |
| 47                                                                      | Rolandic Oper L    | Precentral R       | 96 | Insula L        | Frontal Mid Orb L  |
| 48                                                                      | Rolandic Oper L    | Frontal Mid L      | 97 | Insula L        | Frontal Inf Oper R |
| 49                                                                      | Rolandic Oper L    | Frontal Mid R      |    |                 |                    |

<sup>a</sup>Features are disturbed connections that are part of the NBS network when comparing bipolar-I patients with hallucinations to healthy controls.



**Supplementary Table 16. List of abbreviations for brain areas AAL-atlas<sup>a</sup>.**

| No. | Abbreviation | Region               | No. | Abbreviation | Region               |
|-----|--------------|----------------------|-----|--------------|----------------------|
| 1   | PreCG.L      | Precentral L         | 46  | CUN.R        | Cuneus R             |
| 2   | PreCG.R      | Precentral R         | 47  | LING.L       | Lingual L            |
| 3   | SFGdor.L     | Frontal Sup L        | 48  | LING.R       | Lingual R            |
| 4   | SFGdor.R     | Frontal Sup R        | 49  | SOG.L        | Occipital Sup L      |
| 5   | ORBsup.L     | Frontal Sup Orb L    | 50  | SOG.R        | Occipital Sup R      |
| 6   | ORBsup.R     | Frontal Sup Orb R    | 51  | MOG.L        | Occipital Mid L      |
| 7   | MFG.L        | Frontal Mid L        | 52  | MOG.R        | Occipital Mid R      |
| 8   | MFG.R        | Frontal Mid R        | 53  | IOG.L        | Occipital Inf L      |
| 9   | ORBmid.L     | Frontal Mid Orb L    | 54  | IOG.R        | Occipital Inf R      |
| 10  | ORBmid.R     | Frontal Mid Orb R    | 55  | FFG.L        | Fusiform L           |
| 11  | IFGoperc.L   | Frontal Inf Oper L   | 56  | FFG.R        | Fusiform R           |
| 12  | IFGoperc.R   | Frontal Inf Oper R   | 57  | PoCG.L       | Postcentral L        |
| 13  | IFGtriang.L  | Frontal Inf Tri L    | 58  | PoCG.R       | Postcentral R        |
| 14  | IFGtriang.R  | Frontal Inf Tri R    | 59  | SPG.L        | Parietal Sup L       |
| 15  | ORBinf.L     | Frontal Inf Orb L    | 60  | SPG.R        | Parietal Sup R       |
| 16  | ORBinf.R     | Frontal Inf Orb R    | 61  | IPL.L        | Parietal Inf L       |
| 17  | ROL.L        | Rolandic Oper L      | 62  | IPL.R        | Parietal Inf R       |
| 18  | ROL.R        | Rolandic Oper R      | 63  | SMG.L        | SupraMarginal L      |
| 19  | SMA.L        | Supp Motor Area L    | 64  | SMG.R        | SupraMarginal R      |
| 20  | SMA.R        | Supp Motor Area R    | 65  | ANG.L        | Angular L            |
| 21  | OLF.L        | Olfactory L          | 66  | ANG.R        | Angular R            |
| 22  | OLF.R        | Olfactory R          | 67  | PCUN.L       | Precuneus L          |
| 23  | SFGmed.L     | Frontal Sup Medial L | 68  | PCUN.R       | Precuneus R          |
| 24  | SFGmed.R     | Frontal Sup Medial R | 69  | PCL.L        | Paracentral Lobule L |
| 25  | ORBsupmed.L  | Frontal Med Orb L    | 70  | PCL.R        | Paracentral Lobule R |
| 26  | ORBsupmed.R  | Frontal Med Orb R    | 71  | CAU.L        | Caudate L            |
| 27  | REC.L        | Rectus L             | 72  | CAU.R        | Caudate R            |
| 28  | REC.R        | Rectus R             | 73  | PUT.L        | Putamen L            |
| 29  | INS.L        | Insula L             | 74  | PUT.R        | Putamen R            |
| 30  | INS.R        | Insula R             | 75  | PAL.L        | Pallidum L           |
| 31  | ACG.L        | Cingulum Ant L       | 76  | PAL.R        | Pallidum R           |
| 32  | ACG.R        | Cingulum Ant R       | 77  | THA.L        | Thalamus L           |
| 33  | DCG.L        | Cingulum Mid L       | 78  | THA.R        | Thalamus R           |
| 34  | DCG.R        | Cingulum Mid R       | 79  | HES.L        | Heschl L             |
| 35  | PCG.L        | Cingulum Post L      | 80  | HES.R        | Heschl R             |
| 36  | PCG.R        | Cingulum Post R      | 81  | STG.L        | Temporal Sup L       |
| 37  | HIP.L        | Hippocampus L        | 82  | STG.R        | Temporal Sup R       |
| 38  | HIP.R        | Hippocampus R        | 83  | TPOsup.L     | Temporal Pole Sup L  |
| 39  | PHG.L        | ParaHippocampal L    | 84  | TPOsup.R     | Temporal Pole Sup R  |
| 40  | PHG.R        | ParaHippocampal R    | 85  | MTG.L        | Temporal Mid L       |
| 41  | AMYG.L       | Amygdala L           | 86  | MTG.R        | Temporal Mid R       |
| 42  | AMYG.R       | Amygdala R           | 87  | TPOmid.L     | Temporal Pole Mid L  |
| 43  | CAL.L        | Calcarine L          | 88  | TPOmid.R     | Temporal Pole Mid R  |
| 44  | CAL.R        | Calcarine R          | 89  | ITG.L        | Temporal Inf L       |
| 45  | CUN.L        | Cuneus L             | 90  | ITG.R        | Temporal Inf R       |

<sup>a</sup> Tzourio-Mazoyer and colleagues [58].
